# Supplementary material for: Theoretical investigation on the effect of the ligand on bis-silylation of C(sp)–C(sp) by Ni complexes
Source: Royal Society of Chemistry journal article supplement (doi:10.1039/d1ra08153e), 2022-01-01
Supplement: d1ra08153e1.pdf [file d1ra08153e1.pdf]

# Theoretical Investigation on the Effect of Ligand on Bis-silylation of C(sp)-C(sp) by Ni complexes

Hui Li\*, Yuhan He, Jiaqi Wang

E-mail: lihui@nun.edu.cn

## Supporting Information

### Table of Contents

|                                                                                                                                                                                                           |           |
|-----------------------------------------------------------------------------------------------------------------------------------------------------------------------------------------------------------|-----------|
| <b>Table S1. Energies calculated at B3LYP/BSI (6-31g*, SDD) level in gas phase, and correction energies calculated at <math>\omega</math>B97X-D/BSII (6-311g**, SDD) in toluene of reaction pathways.</b> | <b>S2</b> |
| <b>Figure S1. Reaction mechanism of Bis-silylation of C(sp)-C(sp) bond catalyzed by Ni-complex.</b>                                                                                                       | <b>S4</b> |
| <b>Figure S2. Energies surface of Bis-silylation of C(sp)-C(sp) bond catalyzed by Ni-complex in gas phase.</b>                                                                                            | <b>S5</b> |
| <b>Figure S3. Restrained electrostatic potential (RESP) surface in R2a, R2b and R2c.</b>                                                                                                                  | <b>S6</b> |
| <b>Cartesian coordinates of all stationary points optimized at <math>\omega</math>B97X-D/BSI (6-311g**, SDD) level.</b>                                                                                   | <b>S7</b> |

**Table S1. Energies calculated at B3LYP/BSI (6-31g\*, SDD) level in gas phase, and correction energies calculated at  $\omega$ B97X-D/BSII (6-311g\*\*, SDD) in toluene of reaction pathways. (unit: a.u.)**

|                 | <i>E+ZPE</i> | <i>E</i>     | <i>H</i>     | <i>G</i>     | <i>G<sub>toluene</sub></i> |
|-----------------|--------------|--------------|--------------|--------------|----------------------------|
| <b>Ni1a</b>     | -794.675688  | -794.659152  | -794.658208  | -794.717528  | -794.708708                |
| <b>Ni1b</b>     | -794.635311  | -794.617763  | -794.616819  | -794.681146  | -794.665765                |
| <b>Ni2a</b>     | -1863.740699 | -1863.697611 | -1863.696667 | -1863.820056 | -1863.753804               |
| <b>Ni3a</b>     | -1329.199968 | -1329.170051 | -1329.169107 | -1329.261049 | -1329.221768               |
| <b>SIPr(01)</b> | -846.372946  | -846.352716  | -846.351772  | -846.422485  | -846.379478                |
| <b>SIPr(03)</b> | -846.263642  | -846.243521  | -846.242577  | -846.314001  | -846.265844                |
| <b>COD</b>      | -311.845714  | -311.838086  | -311.837142  | -311.877514  | -311.868569                |
| <b>R1</b>       | -1179.639117 | -1179.618144 | -1179.617199 | -1179.688619 | -1179.66247                |
| <b>INT1a</b>    | -1662.437887 | -1662.406974 | -1662.406029 | -1662.499658 | -1662.480203               |
| <b>INT1b</b>    | -1662.416953 | -1662.385628 | -1662.384683 | -1662.480569 | -1662.462475               |
| <b>INT1c</b>    | -2196.980957 | -2196.936321 | -2196.935377 | -2197.062466 | -2197.015828               |
| <b>TS1a</b>     | -1662.418635 | -1662.388955 | -1662.388011 | -1662.477147 | -1662.467915               |
| <b>TS1c</b>     | -2196.95698  | -2196.91358  | -2196.91264  | -2197.03232  | -2197.005594               |
| <b>INT2a</b>    | -1662.43845  | -1662.407616 | -1662.406672 | -1662.49871  | -1662.485624               |
| <b>INT2b</b>    | -1662.416751 | -1662.38433  | -1662.383386 | -1662.48424  | -1662.46715                |
| <b>INT2c</b>    | -2196.957237 | -2196.913454 | -2196.91251  | -2197.032921 | -2197.008045               |
| <b>INT3a</b>    | -1506.504107 | -1506.475424 | -1506.47448  | -1506.562193 | -1506.534595               |
| <b>INT3b</b>    | -1506.467866 | -1506.437985 | -1506.437041 | -1506.529503 | -1506.50258                |
| <b>INT3c</b>    | -1698.188469 | -1698.157022 | -1698.156077 | -1698.250888 | -1698.209428               |
| <b>INT3d</b>    | -1698.190888 | -1698.159337 | -1698.158393 | -1698.253524 | -1698.211529               |
| <b>INT3e</b>    | -1889.875098 | -1889.840777 | -1889.839832 | -1889.941781 | -1889.884158               |
| <b>TS2a</b>     | -1506.481983 | -1506.454565 | -1506.45362  | -1506.538205 | -1506.508445               |
| <b>TS2b</b>     | -1506.452242 | -1506.423892 | -1506.422948 | -1506.511959 | -1506.479042               |
| <b>TS2c</b>     | -1698.165662 | -1698.135198 | -1698.134254 | -1698.226371 | -1698.185428               |
| <b>TS2d</b>     | -1698.170207 | -1698.139656 | -1698.138712 | -1698.232074 | -1698.185422               |
| <b>TS2e</b>     | -1889.851991 | -1889.818563 | -1889.817619 | -1889.917234 | -1889.860061               |
| <b>R2a</b>      | -155.894337  | -155.88856   | -155.887616  | -155.922     | -155.909483                |
| <b>R2b</b>      | -539.269068  | -539.258852  | -539.257908  | -539.306218  | -539.249874                |

---

|              |              |              |              |              |              |
|--------------|--------------|--------------|--------------|--------------|--------------|
| <b>R2c</b>   | -347.581994  | -347.574522  | -347.573578  | -347.614384  | -347.581116  |
| <b>INT4a</b> | -1818.365682 | -1818.330193 | -1818.329249 | -1818.430198 | -1818.423831 |
| <b>INT4c</b> | -2352.89192  | -2352.84382  | -2352.842876 | -2352.971237 | -2352.947544 |
| <b>TS3a</b>  | -1818.341259 | -1818.305842 | -1818.304897 | -1818.406502 | -1818.397159 |
| <b>Pro</b>   | -1335.566664 | -1335.54082  | -1335.539875 | -1335.622107 | -1335.594008 |

---

Figure S1. Reaction mechanism of Bis-silylation of C(sp)-C(sp) bond catalyzed by Ni-complex.

[Ni] = Ni1a/COD as ligand/multiplicity=1

Ni1b/COD as ligand/multiplicity=3

Ni2a/SIPr as ligand/multiplicity=1

Ni2b/SIPr as ligand/multiplicity=3

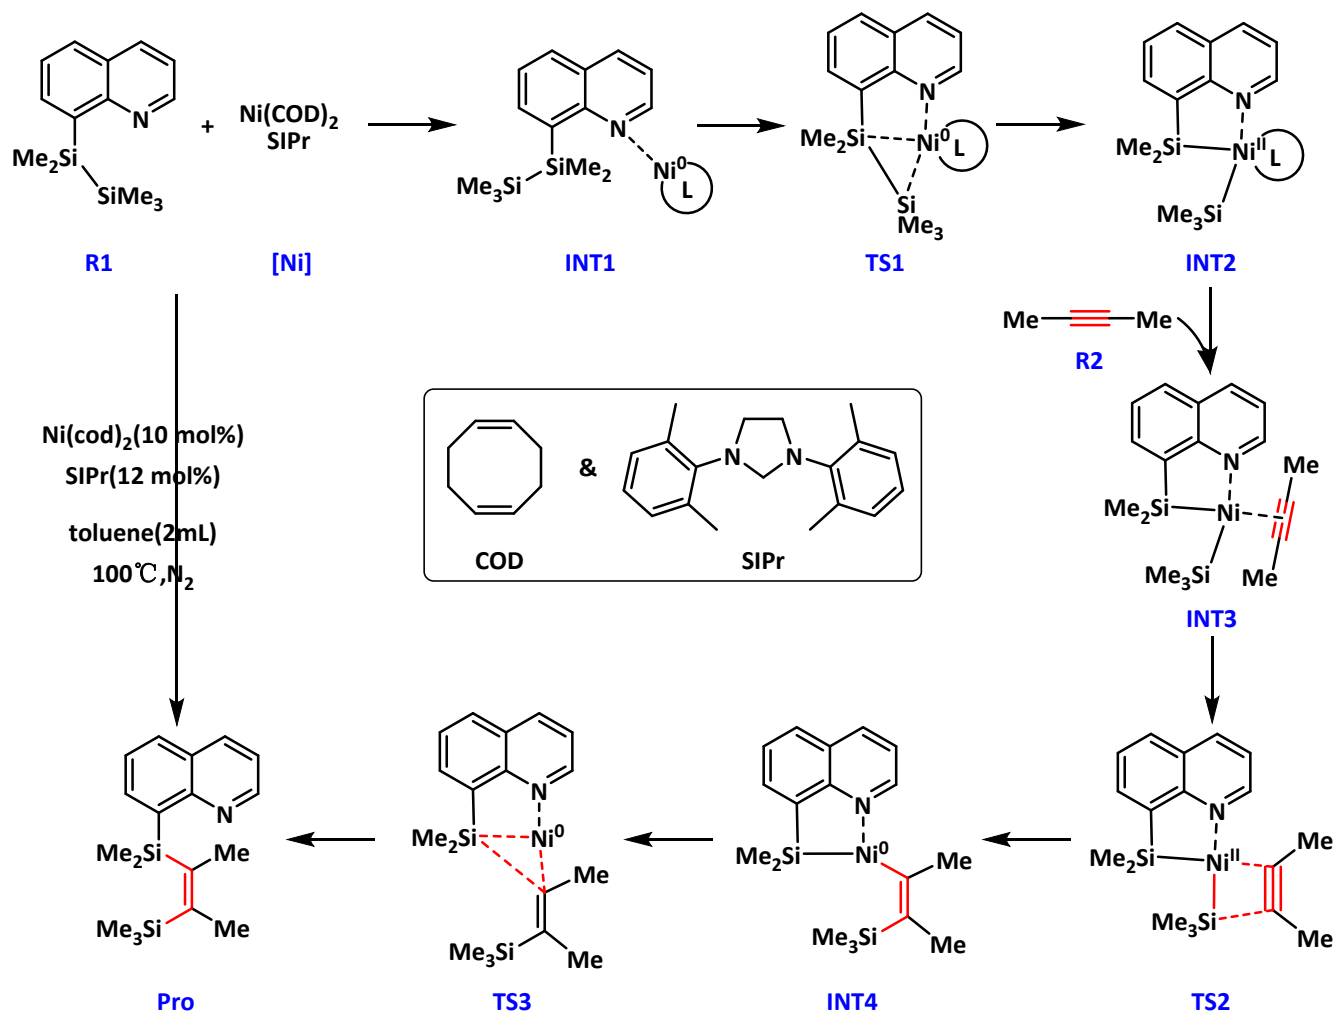

Figure S2. Energies surface of Bis-silylation of C(sp)-C(sp) bond catalyzed by Ni-complex in gas phase.

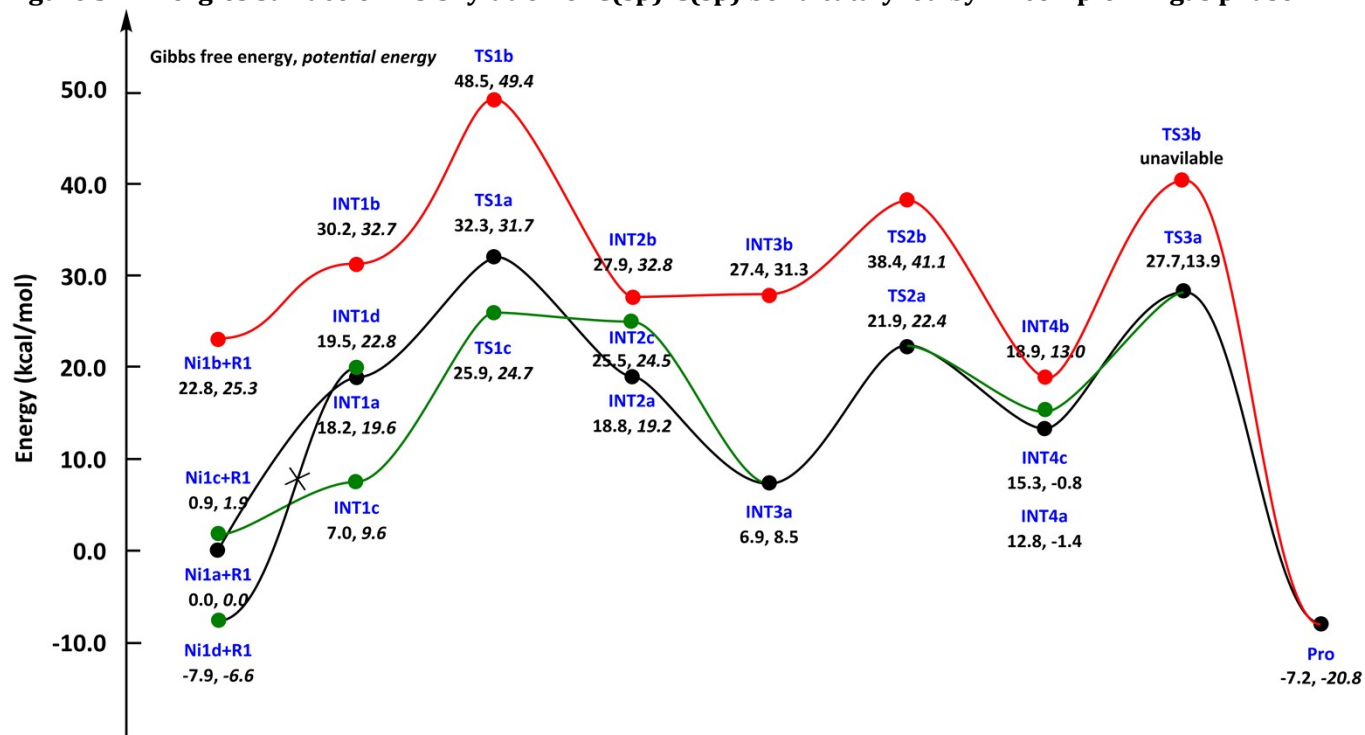

Figure S3. Restrained electrostatic potential (RESP) surface in R2a, R2b and R2c.

R2a

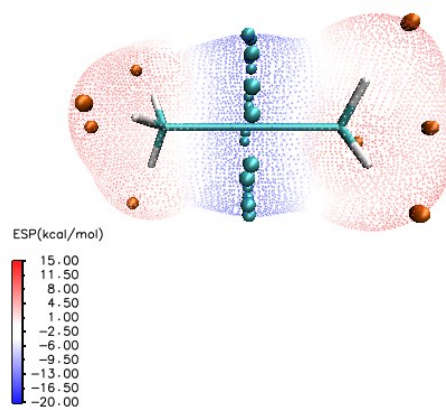

R2b

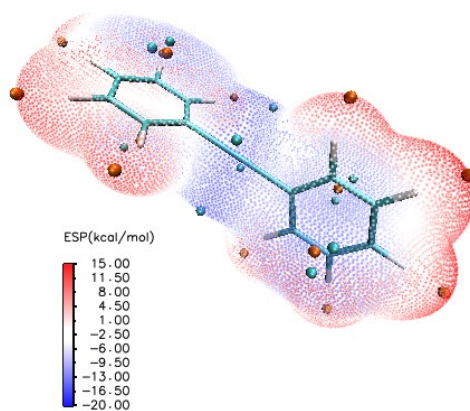

R2c

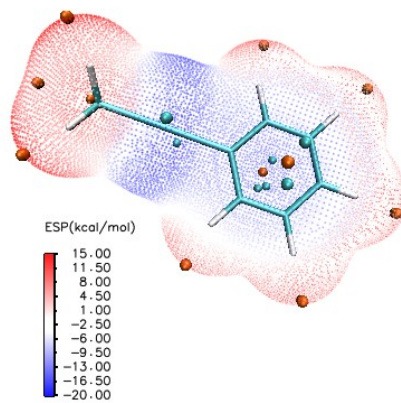

S6

**Cartesian coordinates of all stationary points optimized at  $\omega$ B97X-D/BSI (6-311g\*\*, SDD) level.****Ni1a**

|    |             |             |             |
|----|-------------|-------------|-------------|
| C  | -2.02865000 | 1.75063600  | 1.17102500  |
| C  | -1.39364100 | 0.96413600  | 0.20249600  |
| C  | -0.12837600 | 1.41229300  | -0.27852500 |
| C  | 0.38544800  | 2.68368200  | 0.11893300  |
| C  | -0.30809200 | 3.43775100  | 1.08580000  |
| C  | -1.48996200 | 2.96428100  | 1.63058500  |
| H  | -2.98741100 | 1.43456600  | 1.57197000  |
| C  | 1.58951600  | 3.16236700  | -0.51205600 |
| H  | 0.09814100  | 4.39915900  | 1.39452800  |
| H  | -2.01752100 | 3.54228700  | 2.38469600  |
| C  | 2.18352800  | 2.43250900  | -1.49722500 |
| C  | 1.66913600  | 1.12536900  | -1.83625200 |
| H  | 1.97718100  | 4.13764800  | -0.22549100 |
| H  | 3.04707800  | 2.81513100  | -2.03662000 |
| H  | 1.88622100  | 0.71254000  | -2.82334100 |
| N  | 0.57604500  | 0.60059400  | -1.16934400 |
| Si | -2.33928500 | -0.45839000 | -0.65400000 |
| Si | -4.51113300 | -0.73593600 | 0.27574800  |
| C  | -2.53921400 | 0.00564700  | -2.49052300 |
| H  | -3.05657100 | 0.96443200  | -2.61158100 |
| H  | -1.55478900 | 0.09042800  | -2.96306800 |
| H  | -3.11477400 | -0.75732100 | -3.02941600 |
| C  | -1.50206700 | -2.16820700 | -0.58720800 |
| H  | -0.50673300 | -2.12779300 | -1.04057900 |
| H  | -1.40694200 | -2.55188200 | 0.43547900  |
| H  | -2.10503600 | -2.89048200 | -1.15229000 |
| C  | -5.36045200 | -2.17232300 | -0.64930800 |
| H  | -4.80823800 | -3.11273000 | -0.53453200 |
| H  | -6.37460700 | -2.33531900 | -0.26207500 |
| H  | -5.44665900 | -1.96770200 | -1.72329200 |
| C  | -4.45850300 | -1.20189400 | 2.12501000  |
| H  | -4.00276800 | -0.41812100 | 2.74129900  |
| H  | -5.47213100 | -1.37768600 | 2.50825000  |
| H  | -3.88244300 | -2.12141200 | 2.28571400  |
| C  | -5.60724700 | 0.80873400  | 0.06080000  |
| H  | -6.61170900 | 0.63065100  | 0.46632800  |
| H  | -5.19282400 | 1.68696300  | 0.56857800  |
| H  | -5.72032000 | 1.06713200  | -0.99893100 |
| C  | 3.79393500  | -2.69897900 | -0.00370700 |
| C  | 2.39499900  | -2.92618600 | 0.63401300  |
| C  | 4.62889600  | 0.19841900  | 1.02699800  |
| C  | 1.69701500  | -1.65534400 | 1.07294600  |
| C  | 3.72415800  | -0.45587100 | 2.10601100  |
| C  | 2.27314200  | -0.56664100 | 1.67611000  |
| H  | 4.03062200  | -3.56296700 | -0.63560100 |
| H  | 2.48786500  | -3.63207400 | 1.47391700  |
| H  | 4.53249400  | 1.28855100  | 1.10069100  |
| H  | 3.78029700  | 0.14799200  | 3.01930300  |
| H  | 4.56353700  | -2.67893600 | 0.77432400  |
| H  | 1.74574500  | -3.41809700 | -0.10017000 |
| H  | 5.68405800  | -0.02818000 | 1.24849500  |
| H  | 0.61269500  | -1.67040400 | 1.01043100  |
| H  | 4.10918800  | -1.44412800 | 2.37365700  |
| H  | 1.60625900  | 0.22288300  | 2.02169700  |
| C  | 3.87960800  | -1.43415000 | -0.84617100 |
| C  | 4.28254100  | -0.18912500 | -0.39638800 |
| Ni | 2.19433400  | -0.22688300 | -0.48451600 |
| H  | 3.84690900  | -1.58129500 | -1.92600000 |
| H  | 4.57107100  | 0.54265600  | -1.14918400 |

**Ni1b**

|    |             |             |             |
|----|-------------|-------------|-------------|
| C  | -2.13161800 | 1.74644200  | 1.15738200  |
| C  | -1.43975300 | 1.00368300  | 0.18800500  |
| C  | -0.20096500 | 1.52899500  | -0.28772600 |
| C  | 0.24662700  | 2.82087600  | 0.15447400  |
| C  | -0.49838800 | 3.51568300  | 1.12482400  |
| C  | -1.66984800 | 2.97762700  | 1.63993800  |
| H  | -3.07035300 | 1.36499000  | 1.54952100  |
| C  | 1.43939900  | 3.37909000  | -0.42915700 |
| H  | -0.14167200 | 4.48721600  | 1.46117400  |
| H  | -2.23730700 | 3.51639900  | 2.39403100  |
| C  | 2.09548600  | 2.69214400  | -1.42131000 |
| C  | 1.64556500  | 1.40159300  | -1.79062900 |
| H  | 1.76950900  | 4.36433900  | -0.10995400 |
| H  | 2.95191800  | 3.12225300  | -1.93490300 |
| H  | 2.00113500  | 0.94673300  | -2.71496800 |
| N  | 0.54939600  | 0.78951300  | -1.19785000 |
| Si | -2.21688900 | -0.58897800 | -0.51142100 |
| Si | -4.50510700 | -0.78969400 | 0.09932200  |
| C  | -2.15840200 | -0.60041000 | -2.41415400 |
| H  | -2.69262100 | 0.26091800  | -2.83304100 |
| H  | -1.12292200 | -0.55323600 | -2.76332500 |
| H  | -2.62497800 | -1.50965200 | -2.81377600 |
| C  | -1.30817400 | -2.13167700 | 0.14378800  |
| H  | -0.24287800 | -2.07751800 | -0.10435900 |
| H  | -1.39692700 | -2.21345800 | 1.23392500  |
| H  | -1.71757900 | -3.05034000 | -0.29528300 |
| C  | -5.21705900 | -2.30927200 | -0.80849000 |
| H  | -4.68044400 | -3.22839900 | -0.54392300 |
| H  | -6.27300500 | -2.45639400 | -0.54702400 |
| H  | -5.15939800 | -2.19361700 | -1.89724600 |
| C  | -4.75989500 | -1.08253600 | 1.96755800  |
| H  | -4.42271800 | -0.23566400 | 2.57666700  |
| H  | -5.82297400 | -1.24502800 | 2.18849500  |
| H  | -4.21381000 | -1.97024600 | 2.30950300  |
| C  | -5.52220800 | 0.73223000  | -0.42970300 |
| H  | -6.58257200 | 0.60056800  | -0.17803400 |
| H  | -5.17285700 | 1.64887300  | 0.05890500  |
| H  | -5.45667900 | 0.89317100  | -1.51262700 |
| C  | 2.75808300  | -2.62957700 | 1.28023900  |
| C  | 2.21507200  | -1.48195000 | 2.17373200  |
| C  | 4.91995300  | -1.16625100 | -0.53285300 |
| C  | 2.44209200  | -0.08580600 | 1.62276700  |
| C  | 4.86502600  | -0.41181800 | 0.82156200  |
| C  | 3.58447200  | 0.38316100  | 1.01260800  |
| H  | 2.20727600  | -3.54541200 | 1.52313500  |
| H  | 2.64549900  | -1.56826400 | 3.18517100  |
| H  | 5.28025600  | -0.47737400 | -1.30566600 |
| H  | 5.72069200  | 0.27143700  | 0.87589300  |
| H  | 3.80500500  | -2.83787800 | 1.52495300  |
| H  | 1.13445700  | -1.61442400 | 2.29396000  |
| H  | 5.66936300  | -1.97334600 | -0.47214000 |
| H  | 1.68202100  | 0.64833800  | 1.88840500  |
| H  | 4.99046800  | -1.11513000 | 1.65053200  |
| H  | 3.63432500  | 1.45023400  | 0.80519100  |
| C  | 2.62569700  | -2.35533800 | -0.21196000 |
| C  | 3.58252400  | -1.71527900 | -0.99710200 |
| Ni | 2.12070300  | -0.30192200 | -0.51097400 |

H 1.85072500 -2.91226200 -0.73668200

### Ni2a

Ni -0.00002300 0.00064800 0.00010500  
C -0.44232800 0.62284100 4.11069800  
C 0.46273300 -0.62038200 4.10868800  
C 0.00481200 0.00090300 1.85191000  
H -1.44287100 0.40758700 4.51035600  
H -0.02320200 1.45189100 4.69116900  
H 0.04646900 -1.44929600 4.69136800  
H 1.46518100 -0.40504500 4.50346100  
N -0.51381200 0.95957900 2.67718900  
N 0.52755400 -0.95733000 2.67492800  
C 1.25532700 -2.10821600 2.23034400  
C 2.63148400 -1.99922200 1.95053300  
C 0.58269500 -3.34165400 2.13878900  
C 3.32636900 -3.15494600 1.57469900  
C 1.31364500 -4.47375700 1.76035000  
C 2.67644200 -4.38459700 1.48176500  
H 4.38877300 -3.08427300 1.35350900  
H 0.80458000 -5.43156700 1.68295400  
H 3.23196400 -5.27306700 1.19230900  
C -1.24508600 2.10957800 2.23594700  
C -2.62285600 1.99953400 1.96466500  
C -0.57377500 3.34335100 2.13932600  
C -3.32078600 3.15467100 1.59275300  
C -1.30781600 4.47488600 1.76509900  
C -2.67229300 4.38476300 1.49530200  
H -4.38448500 3.08322300 1.37815900  
H -0.79980700 5.43295900 1.68404500  
H -3.23025500 5.27275600 1.20909500  
C 0.91091200 3.43890500 2.39647600  
H 1.17572200 3.12642000 3.41439000  
H 1.46675100 2.79243700 1.70755000  
H 1.26199500 4.46718500 2.26336800  
C -3.32572100 0.66539200 2.03186000  
H -2.90497400 -0.02888600 1.29406800  
H -3.22109700 0.19209900 3.01564900  
H -4.39518600 0.77940500 1.82847300  
C 3.33598900 -0.66571400 2.01371700  
H 2.91369000 0.02826400 1.27652000  
H 3.23493600 -0.19109100 2.99723200  
H 4.40467600 -0.78115900 1.80705600  
C -0.90035500 -3.43633200 2.40568600  
H -1.15801400 -3.12569000 3.42599500  
H -1.46035200 -2.78811000 1.72180900  
H -1.25322800 -4.46406800 2.27313700  
C -0.00421200 -0.00020200 -1.85167000  
N -0.96413400 -0.52167000 -2.67355800  
N 0.95194100 0.52108000 -2.67794600  
C -0.63057800 -0.45352500 -4.10800500  
C -2.11397900 -1.25064700 -2.22836000  
C 0.61296000 0.45120200 -4.11095500  
C 2.10397800 1.24964300 -2.23762900  
H -1.46069500 -0.03532000 -4.68758100  
H -0.41680200 -1.45505200 -4.50593800  
C -3.34785300 -0.57899000 -2.13519000  
C -2.00384300 -2.62705100 -1.95027200  
H 0.39746000 1.45226400 -4.50909300  
H 1.44095100 0.03248400 -4.69324600  
C 3.33710800 0.57651500 -2.14518600  
C 1.99632700 2.62694500 -1.96290700  
C -4.47932800 -1.31127400 -1.75738900

H 3.48943500 -1.83886400 -2.07765400  
C -3.44361700 0.90431600 -2.40026700  
C -3.15894600 -3.32327600 -1.57513200  
C -0.66964200 -3.33023000 -2.01351300  
C 4.47038200 1.30833800 -1.77187800  
C 3.43018600 -0.90789400 -2.40508400  
C 3.15319000 3.32263100 -1.59219600  
C 0.66288800 3.33165800 -2.02524100  
C -4.38908800 -2.67439800 -1.48091500  
H -5.43748600 -0.80300800 -1.67903200  
H -2.79506500 1.46383000 -1.71631100  
H -3.13408800 1.16318600 -3.42059500  
H -4.47140700 1.25654000 -2.26632100  
H -3.08742700 -4.38590200 -1.35528900  
H -0.19369400 -3.22639100 -2.99610700  
H 0.02303400 -2.90914100 -1.27433800  
H -0.78448900 -4.39951600 -1.80963200  
C 4.38265800 2.67234600 -1.49898100  
H 5.42795600 0.79889000 -1.69397200  
H 2.78495400 -1.46419100 -1.71531500  
H 3.11483700 -1.17061100 -3.42264600  
H 4.45839700 -1.26039300 -2.27524100  
H 3.08360600 4.38593700 -1.37506800  
H 0.18602500 3.22801000 -3.00740200  
H -0.02952900 2.91159200 -1.28525000  
H 0.77914300 4.40089800 -1.82190200  
H -5.27705800 -3.23103800 -1.19208100  
H 5.27202200 3.22851900 -1.21355800

### Ni3a

C 1.37699400 3.52433400 -0.67499500  
C 1.77630800 3.11561800 0.77164500  
C -1.77578800 3.11688800 -0.77165000  
C 0.73808100 2.27471500 1.48506400  
C -1.37624200 3.52523100 0.67502300  
C -0.63116100 2.42912300 1.41566900  
H 2.29171200 3.77305500 -1.22736400  
H 2.02023600 4.02225000 1.34978000  
H -2.70163900 2.52979400 -0.72868700  
H -2.29081100 3.77448100 1.22740200  
H 0.78193200 4.44264500 -0.65551500  
H 2.70174000 2.52787300 0.72860700  
H -2.01905900 4.02371300 -1.34976000  
H 1.13367200 1.60791600 2.25025700  
H -0.78061500 4.44317600 0.65564100  
H -1.23242800 1.83505700 2.10329800  
C 0.63119900 2.42876800 -1.41573200  
C -0.73813200 2.27528400 -1.48506200  
Ni -0.00033600 0.93875900 0.00001800  
H 1.23206400 1.83431500 -2.10337100  
H -1.13417900 1.60863000 -2.25014900  
C -0.00004500 -0.94045900 -0.00000400  
N -1.09101800 -1.77706600 -0.03930800  
N 1.09099200 -1.77697500 0.03936800  
C -0.76047300 -3.20413800 0.10948300  
C -2.44471200 -1.31733600 0.01891700  
C 0.76055800 -3.20407700 -0.10940400  
C 2.44465700 -1.31717600 -0.01889100  
H -1.29439000 -3.81480100 -0.62682600  
H -1.03092300 -3.57140800 1.11006500  
C -3.15418300 -1.14953500 -1.18624500  
C -3.05114700 -1.06570400 1.26556200  
H 1.03105000 -3.57133300 -1.10998200



|   |             |             |             |
|---|-------------|-------------|-------------|
| H | 1.29452200  | -3.81468600 | 0.62691700  |
| C | 3.15419000  | -1.14936900 | 1.18623600  |
| C | -4.48378300 | -0.71627100 | -1.12592700 |
| C | -2.49174100 | -1.41956600 | -2.51643900 |
| C | -4.38304900 | -0.63416000 | 1.28410200  |
| C | -2.28754300 | -1.24681100 | 2.55655400  |
| C | 4.38298000  | -0.63417900 | -1.28418700 |
| C | 2.28743400  | -1.24695200 | -2.55652200 |
| C | 4.48379800  | -0.71613500 | 1.12584400  |
| C | 2.49186300  | -1.41949400 | 2.51647000  |
| C | -5.09662800 | -0.45975900 | 0.09960300  |
| H | -5.03980000 | -0.57956600 | -2.05037700 |
| H | -1.58120300 | -0.82126200 | -2.62937400 |
| H | -2.19737000 | -2.47172600 | -2.61952300 |
| H | -3.16878800 | -1.18193500 | -3.34305900 |
| H | -4.86066600 | -0.43254400 | 2.24007300  |
| H | -2.08977400 | -2.30576400 | 2.76882300  |
| H | -1.31908300 | -0.73686700 | 2.51480800  |
| H | -2.85574300 | -0.84601000 | 3.40194800  |
| C | 5.09660500  | -0.45970900 | -0.09972500 |
| H | 4.86057900  | -0.43267700 | -2.24019200 |
| H | 2.08986300  | -2.30595700 | -2.76873800 |
| H | 1.31888300  | -0.73718700 | -2.51476100 |
| H | 2.85552400  | -0.84608000 | -3.40195500 |
| H | 5.03986900  | -0.57943800 | 2.05026200  |
| H | 1.58123600  | -0.82134300 | 2.62945900  |
| H | 2.19767000  | -2.47170500 | 2.61957600  |
| H | 3.16892200  | -1.18175600 | 3.34304900  |
| H | -6.12973400 | -0.12333100 | 0.13137400  |
| H | 6.12972700  | -0.12333600 | -0.13155600 |

### SIPr(01)

|   |             |             |             |
|---|-------------|-------------|-------------|
| C | 0.76186400  | -0.08785300 | 1.91299700  |
| C | -0.76185700 | 0.08784000  | 1.91300200  |
| C | -0.00000200 | 0.00002700  | -0.35525400 |
| H | 1.27878300  | 0.67275300  | 2.50449500  |
| H | 1.07299600  | -1.07421300 | 2.28142100  |
| H | -1.07298900 | 1.07419400  | 2.28144000  |
| H | -1.27877100 | -0.67277400 | 2.50449300  |
| N | 1.07758200  | 0.03899600  | 0.46350800  |
| N | -1.07758100 | -0.03899300 | 0.46351100  |
| C | -2.42839500 | 0.04923200  | -0.00351200 |
| C | -2.87930400 | 1.24155800  | -0.60541500 |
| C | -3.28661000 | -1.05434800 | 0.16320300  |
| C | -4.20998100 | 1.30971500  | -1.03071200 |
| C | -4.61338400 | -0.94126900 | -0.26970100 |
| C | -5.07625300 | 0.23140700  | -0.85964400 |
| H | -4.56773000 | 2.22329200  | -1.49942800 |
| H | -5.28199700 | -1.79073000 | -0.15115100 |
| H | -6.10773800 | 0.30287100  | -1.19468400 |
| C | 2.42839400  | -0.04923400 | -0.00352100 |
| C | 3.28660100  | 1.05434900  | 0.16320000  |
| C | 2.87931100  | -1.24156000 | -0.60541900 |
| C | 4.61337800  | 0.94127700  | -0.26969800 |
| C | 4.20999100  | -1.30971100 | -1.03071000 |
| C | 5.07625500  | -0.23139700 | -0.85964000 |
| H | 5.28198700  | 1.79073900  | -0.15114200 |
| H | 4.56774800  | -2.22328700 | -1.49942100 |
| H | 6.10774200  | -0.30285600 | -1.19467400 |
| C | 1.95283400  | -2.41725200 | -0.80404400 |
| H | 1.53816100  | -2.77199200 | 0.14828500  |
| H | 1.10241500  | -2.14065800 | -1.43572300 |
| H | 2.48307700  | -3.25352600 | -1.27003200 |

|   |             |             |             |
|---|-------------|-------------|-------------|
| C | 3.05105900  | -1.06565800 | -1.26556800 |
| C | 2.79773800  | 2.34834100  | 0.77043700  |
| H | 1.77801300  | 2.57814600  | 0.44645700  |
| H | 2.79103800  | 2.31248800  | 1.86855800  |
| H | 3.44747200  | 3.18028100  | 0.48137500  |
| C | -1.95281900 | 2.41724400  | -0.80404000 |
| H | -1.53814700 | 2.77198100  | 0.14829100  |
| H | -1.10239900 | 2.14064600  | -1.43571600 |
| H | -2.48305600 | 3.25352000  | -1.27003000 |
| C | -2.79776100 | -2.34835400 | 0.77042300  |
| H | -1.77801500 | -2.57813600 | 0.44649100  |
| H | -2.79112500 | -2.31253900 | 1.86854600  |
| H | -3.44746800 | -3.18029300 | 0.48129800  |

### SIPr(03)

|   |             |             |             |
|---|-------------|-------------|-------------|
| C | -0.59643800 | 0.49324600  | 1.63322400  |
| C | 0.59633000  | -0.49276200 | 1.63333000  |
| C | 0.00000600  | 0.00013000  | -0.52360700 |
| H | -1.38495400 | 0.21513200  | 2.33574000  |
| H | -0.26126600 | 1.51414800  | 1.85441500  |
| H | 0.26115100  | -1.51362400 | 1.85469100  |
| H | 1.38482100  | -0.21452400 | 2.33582500  |
| N | -1.09470000 | 0.38113800  | 0.23804100  |
| N | 1.09464500  | -0.38089700 | 0.23814500  |
| C | 2.44675900  | -0.04035800 | -0.04000000 |
| C | 3.43815600  | -0.98749400 | 0.31824800  |
| C | 2.80999100  | 1.17022400  | -0.68320800 |
| C | 4.77921900  | -0.69839200 | 0.05441800  |
| C | 4.16436400  | 1.39852900  | -0.94744300 |
| C | 5.14997300  | 0.48489700  | -0.57973000 |
| H | 5.53747500  | -1.42804500 | 0.32941100  |
| H | 4.44726200  | 2.32788700  | -1.43672800 |
| H | 6.19527100  | 0.69068100  | -0.79297000 |
| C | -2.44676800 | 0.04038900  | -0.04008900 |
| C | -2.80983600 | -1.17033100 | -0.68312900 |
| C | -3.43828700 | 0.98746300  | 0.31798700  |
| C | -4.16417500 | -1.39883900 | -0.94736400 |
| C | -4.77930800 | 0.69816100  | 0.05416500  |
| C | -5.14990300 | -0.48527000 | -0.57981100 |
| H | -4.44694800 | -2.32830300 | -1.43651900 |
| H | -5.53765800 | 1.42776500  | 0.32902600  |
| H | -6.19517100 | -0.69121200 | -0.79304700 |
| C | -3.06325600 | 2.31527200  | 0.93323300  |
| H | -2.79721000 | 2.23360500  | 1.99575400  |
| H | -2.19774600 | 2.75188900  | 0.42180100  |
| H | -3.89787700 | 3.02018000  | 0.86538500  |
| C | -1.80539500 | -2.23468500 | -1.05688100 |
| H | -1.07783800 | -1.87821000 | -1.79587100 |
| H | -1.22194300 | -2.57209900 | -0.19172700 |
| H | -2.31989500 | -3.10805600 | -1.47193300 |
| C | 3.06295200  | -2.31516600 | 0.93368600  |
| H | 2.79682800  | -2.23329600 | 1.99617100  |
| H | 2.19744200  | -2.75178800 | 0.42225900  |
| H | 3.89751300  | -3.02016300 | 0.86602200  |
| C | 1.80569000  | 2.23465300  | -1.05712800 |
| H | 1.07810800  | 1.87817500  | -1.79609200 |
| H | 1.22225800  | 2.57225000  | -0.19203300 |
| H | 2.32031000  | 3.10790600  | -1.47227900 |

### COD

|   |             |             |             |
|---|-------------|-------------|-------------|
| C | -0.87721100 | -1.63329000 | -0.19409400 |
| C | 0.38455600  | -1.81236900 | 0.21320800  |

|   |             |             |             |
|---|-------------|-------------|-------------|
| C | -0.38455600 | 1.81236900  | -0.21320800 |
| C | 1.26363700  | -0.80984900 | 0.92890800  |
| C | 0.87721100  | 1.63329000  | 0.19409400  |
| C | 1.72052400  | 0.38712500  | 0.03323000  |
| H | -1.35218600 | -2.45778300 | -0.72618200 |
| H | 0.74931500  | -0.40903400 | 1.81259100  |
| H | -0.85207100 | 2.77043600  | 0.01485300  |
| H | 1.35218600  | 2.45778300  | 0.72618200  |
| H | 0.85207100  | -2.77043600 | -0.01485300 |
| H | 2.15230200  | -1.33262000 | 1.30075100  |
| H | 2.75837600  | 0.63799300  | 0.28060600  |
| H | 1.72382100  | 0.05766200  | -1.01438000 |
| C | -1.72052400 | -0.38712500 | -0.03323000 |
| H | -1.72382100 | -0.05766200 | 1.01438000  |
| H | -2.75837600 | -0.63799300 | -0.28060600 |
| C | -1.26363700 | 0.80984900  | -0.92890800 |
| H | -0.74931500 | 0.40903400  | -1.81259100 |
| H | -2.15230200 | 1.33262000  | -1.30075100 |

### R1

|    |             |             |             |
|----|-------------|-------------|-------------|
| C  | 0.34613500  | 1.77666400  | -0.00002600 |
| C  | 0.56035700  | 0.40635800  | -0.00007100 |
| C  | 1.92277500  | -0.04514800 | -0.00007600 |
| C  | 3.00217900  | 0.89861700  | -0.00002700 |
| C  | 2.71254100  | 2.28776900  | -0.00001700 |
| C  | 1.40702300  | 2.71651500  | -0.00001600 |
| H  | -0.66926100 | 2.16310000  | -0.00000700 |
| C  | 4.32664200  | 0.39249000  | 0.00000100  |
| H  | 3.53535100  | 2.99925600  | 0.00000900  |
| H  | 1.18013600  | 3.77941500  | 0.00000900  |
| C  | 4.53396800  | -0.96612500 | 0.00001500  |
| C  | 3.40337700  | -1.81831300 | 0.00004200  |
| H  | 5.16235800  | 1.08904100  | 0.00001000  |
| H  | 5.53382600  | -1.38960100 | 0.00002200  |
| H  | 3.54385800  | -2.89908100 | 0.00001700  |
| N  | 2.15632800  | -1.39250300 | -0.00001200 |
| Si | -0.88053600 | -0.85316700 | -0.00008200 |
| Si | -2.98400100 | 0.25310100  | 0.00008600  |
| C  | -0.78518500 | -1.94385100 | -1.55488900 |
| H  | -0.83826400 | -1.34478600 | -2.47155500 |
| H  | 0.15705800  | -2.49989300 | -1.56512100 |
| H  | -1.61267300 | -2.66374500 | -1.57905500 |
| C  | -0.78502400 | -1.94402700 | 1.55459200  |
| H  | 0.15722100  | -2.50007100 | 1.56466900  |
| H  | -0.83801600 | -1.34506800 | 2.47133200  |
| H  | -1.61250700 | -2.66392700 | 1.57875400  |
| C  | -4.34612500 | -1.08019300 | 0.00014900  |
| H  | -4.28193800 | -1.72450700 | 0.88499300  |
| H  | -5.34116700 | -0.61702300 | 0.00023400  |
| H  | -4.28206500 | -1.72445900 | -0.88474000 |
| C  | -3.23453200 | 1.33644800  | 1.54891900  |
| H  | -2.50316400 | 2.15073000  | 1.60983800  |
| H  | -4.23476300 | 1.78846400  | 1.54661200  |
| H  | -3.14217200 | 0.74437900  | 2.46729200  |
| C  | -3.23474900 | 1.33652400  | -1.54866100 |
| H  | -4.23498300 | 1.78853400  | -1.54619400 |
| H  | -2.50339500 | 2.15081400  | -1.60964300 |
| H  | -3.14251300 | 0.74450000  | -2.46707500 |

### INT1a

|   |             |            |            |
|---|-------------|------------|------------|
| C | -2.02865000 | 1.75063600 | 1.17102500 |
| C | -1.39364100 | 0.96413600 | 0.20249600 |

|    |             |             |             |
|----|-------------|-------------|-------------|
| C  | -0.12837600 | 1.41229300  | -0.27852500 |
| C  | 0.38544800  | 2.68368200  | 0.11893300  |
| C  | -0.30809200 | 3.43775100  | 1.08580000  |
| C  | -1.48996200 | 2.96428100  | 1.63058500  |
| H  | -2.98741100 | 1.43456600  | 1.57197000  |
| C  | 1.58951600  | 3.16236700  | -0.51205600 |
| H  | 0.09814100  | 4.39915900  | 1.39452800  |
| H  | -2.01752100 | 3.54228700  | 2.38469600  |
| C  | 2.18352800  | 2.43250900  | -1.49722500 |
| C  | 1.66913600  | 1.12536900  | -1.83625200 |
| H  | 1.97718100  | 4.13764800  | -0.22549100 |
| H  | 3.04707800  | 2.81513100  | -2.03662000 |
| H  | 1.88622100  | 0.71254000  | -2.82334100 |
| N  | 0.57604500  | 0.60059400  | -1.16934400 |
| Si | -2.33928500 | -0.45839000 | -0.65400000 |
| Si | -4.51113300 | -0.73593600 | 0.27574800  |
| C  | -2.53921400 | 0.00564700  | -2.49052300 |
| H  | -3.05657100 | 0.96443200  | -2.61158100 |
| H  | -1.55478900 | 0.09042800  | -2.96306800 |
| H  | -3.11477400 | -0.75732100 | -3.02941600 |
| C  | -1.50206700 | -2.16820700 | -0.58720800 |
| H  | -0.50673300 | -2.12779300 | -1.04057900 |
| H  | -1.40694200 | -2.55188200 | 0.43547900  |
| H  | -2.10503600 | -2.89048200 | -1.15229000 |
| C  | -5.36045200 | -2.17232300 | -0.64930800 |
| H  | -4.80823800 | -3.11273000 | -0.53453200 |
| H  | -6.37460700 | -2.33531900 | -0.26207500 |
| H  | -5.44665900 | -1.96770200 | -1.72329200 |
| C  | -4.45850300 | -1.20189400 | 2.12501000  |
| H  | -4.00276800 | -0.41812100 | 2.74129900  |
| H  | -5.47213100 | -1.37768600 | 2.50825000  |
| H  | -3.88244300 | -2.12141200 | 2.28571400  |
| C  | -5.60724700 | 0.80873400  | 0.06080000  |
| H  | -6.61170900 | 0.63065100  | 0.46632800  |
| H  | -5.19282400 | 1.68696300  | 0.56857800  |
| H  | -5.72032000 | 1.06713200  | -0.99893100 |
| C  | 3.79393500  | -2.69897900 | -0.00370700 |
| C  | 2.39499900  | -2.92618600 | 0.63401300  |
| C  | 4.62889600  | 0.19841900  | 1.02699800  |
| C  | 1.69701500  | -1.65534400 | 1.07294600  |
| C  | 3.72415800  | -0.45587100 | 2.10601100  |
| C  | 2.27314200  | -0.56664100 | 1.67611000  |
| H  | 4.03062200  | -3.56296700 | -0.63560100 |
| H  | 2.48786500  | -3.63207400 | 1.47391700  |
| H  | 4.53249400  | 1.28855100  | 1.10069100  |
| H  | 3.78029700  | 0.14799200  | 3.01930300  |
| H  | 4.56353700  | -2.67893600 | 0.77432400  |
| H  | 1.74574500  | -3.41809700 | -0.10017000 |
| H  | 5.68405800  | -0.02818000 | 1.24849500  |
| H  | 0.61269500  | -1.67040400 | 1.01043100  |
| H  | 4.10918800  | -1.44412800 | 2.37365700  |
| H  | 1.60625900  | 0.22288300  | 2.02169700  |
| C  | 3.87960800  | -1.43415000 | -0.84617100 |
| C  | 4.28254100  | -0.18912500 | -0.39638800 |
| Ni | 2.19433400  | -0.22688300 | -0.48451600 |
| H  | 3.84690900  | -1.58129500 | -1.92600000 |
| H  | 4.57107100  | 0.54265600  | -1.14918400 |

### INT1b

|   |             |            |             |
|---|-------------|------------|-------------|
| C | -2.13161800 | 1.74644200 | 1.15738200  |
| C | -1.43975300 | 1.00368300 | 0.18800500  |
| C | -0.20096500 | 1.52899500 | -0.28772600 |

|    |             |             |             |
|----|-------------|-------------|-------------|
| C  | 0.24662700  | 2.82087600  | 0.15447400  |
| C  | -0.49838800 | 3.51568300  | 1.12482400  |
| C  | -1.66984800 | 2.97762700  | 1.63993800  |
| H  | -3.07035300 | 1.36499000  | 1.54952100  |
| C  | 1.43939900  | 3.37909000  | -0.42915700 |
| H  | -0.14167200 | 4.48721600  | 1.46117400  |
| H  | -2.23730700 | 3.51639900  | 2.39403100  |
| C  | 2.09548600  | 2.69214400  | -1.42131000 |
| C  | 1.64556500  | 1.40159300  | -1.79062900 |
| H  | 1.76950900  | 4.36433900  | -0.10995400 |
| H  | 2.95191800  | 3.12225300  | -1.93490300 |
| H  | 2.00113500  | 0.94673300  | -2.71496800 |
| N  | 0.54939600  | 0.78951300  | -1.19785000 |
| Si | -2.21688900 | -0.58897800 | -0.51142100 |
| Si | -4.50510700 | -0.78969400 | 0.09932200  |
| C  | -2.15840200 | -0.60041000 | -2.41415400 |
| H  | -2.69262100 | 0.26091800  | -2.83304100 |
| H  | -1.12292200 | -0.55323600 | -2.76332500 |
| H  | -2.62497800 | -1.50965200 | -2.81377600 |
| C  | -1.30817400 | -2.13167700 | 0.14378800  |
| H  | -0.24287800 | -2.07751800 | -0.10435900 |
| H  | -1.39692700 | -2.21345800 | 1.23392500  |
| H  | -1.71757900 | -3.05034000 | -0.29528300 |
| C  | -5.21705900 | -2.30927200 | -0.80849000 |
| H  | -4.68044400 | -3.22839900 | -0.54392300 |
| H  | -6.27300500 | -2.45639400 | -0.54702400 |
| H  | -5.15939800 | -2.19361700 | -1.89724600 |
| C  | -4.75989500 | -1.08253600 | 1.96755800  |
| H  | -4.42271800 | -0.23566400 | 2.57666700  |
| H  | -5.82297400 | -1.24502800 | 2.18849500  |
| H  | -4.21381000 | -1.97024600 | 2.30950300  |
| C  | -5.52220800 | 0.73223000  | -0.42970300 |
| H  | -6.58257200 | 0.60056800  | -0.17803400 |
| H  | -5.17285700 | 1.64887300  | 0.05890500  |
| H  | -5.45667900 | 0.89317100  | -1.51262700 |
| C  | 2.75808300  | -2.62957700 | 1.28023900  |
| C  | 2.21507200  | -1.48195000 | 2.17373200  |
| C  | 4.91995300  | -1.16625100 | -0.53285300 |
| C  | 2.44209200  | -0.08580600 | 1.62276700  |
| C  | 4.86502600  | -0.41181800 | 0.82156200  |
| C  | 3.58447200  | 0.38316100  | 1.01260800  |
| H  | 2.20727600  | -3.54541200 | 1.52313500  |
| H  | 2.64549900  | -1.56826400 | 3.18517100  |
| H  | 5.28025600  | -0.47737400 | -1.30566600 |
| H  | 5.72069200  | 0.27143700  | 0.87589300  |
| H  | 3.80500500  | -2.83787800 | 1.52495300  |
| H  | 1.13445700  | -1.61442400 | 2.29396000  |
| H  | 5.66936300  | -1.97334600 | -0.47214000 |
| H  | 1.68202100  | 0.64833800  | 1.88840500  |
| H  | 4.99046800  | -1.11513000 | 1.65053200  |
| H  | 3.63432500  | 1.45023400  | 0.80519100  |
| C  | 2.62569700  | -2.35533800 | -0.21196000 |
| C  | 3.58252400  | -1.71527900 | -0.99710200 |
| Ni | 2.12070300  | -0.30192200 | -0.51097400 |
| H  | 1.85072500  | -2.91226200 | -0.73668200 |
| H  | 3.48943500  | -1.83886400 | -2.07765400 |

### INT1c

|    |             |             |             |
|----|-------------|-------------|-------------|
| Ni | 0.48661300  | 0.18304000  | -0.11096500 |
| Si | -3.44359700 | -0.08360900 | 0.78413200  |
| Si | -3.72283400 | 2.21644800  | 1.30024100  |
| C  | -5.10098900 | -0.99068200 | 1.06609900  |
| C  | -2.18686500 | -0.89223300 | 1.96563700  |

|   |             |             |             |
|---|-------------|-------------|-------------|
| C | -2.96073800 | -0.33843700 | -1.03856500 |
| C | 2.11168200  | -0.60084700 | 0.34434600  |
| N | -1.04166600 | 1.09884300  | -0.74555000 |
| C | -5.25283300 | 2.42309200  | 2.42536000  |
| C | -4.01072300 | 3.25279600  | -0.26871100 |
| C | -2.21683500 | 2.89931500  | 2.24082100  |
| H | -5.01214000 | -2.06828000 | 0.87730200  |
| H | -5.42259700 | -0.86694000 | 2.10747900  |
| H | -5.90561900 | -0.60445900 | 0.42910500  |
| H | -2.52770500 | -0.81904200 | 3.00689700  |
| H | -1.20823200 | -0.40261900 | 1.89321600  |
| H | -2.05132300 | -1.95404700 | 1.72693800  |
| C | -1.82498800 | 0.32251700  | -1.59327100 |
| C | -3.74781700 | -1.10857100 | -1.89679500 |
| N | 2.33969700  | -1.91288500 | 0.63472200  |
| N | 3.31730700  | 0.02828100  | 0.42554200  |
| C | 0.05074800  | 1.75529800  | -1.27376700 |
| H | -6.16828600 | 2.07322700  | 1.93332400  |
| H | -5.40126200 | 3.47867200  | 2.68846600  |
| H | -5.14720200 | 1.86229000  | 3.36233600  |
| H | -4.89374100 | 2.90999100  | -0.82137600 |
| H | -4.16562000 | 4.30984100  | -0.01553800 |
| H | -3.14955700 | 3.18694500  | -0.94220600 |
| H | -1.30724100 | 2.76244000  | 1.64673200  |
| H | -2.33513100 | 3.96955900  | 2.45537000  |
| H | -2.07550500 | 2.38127800  | 3.19743000  |
| C | -1.54482600 | 0.23066100  | -2.99268300 |
| C | -3.46458900 | -1.22715600 | -3.27048300 |
| H | -4.61886400 | -1.62729600 | -1.50486200 |
| C | 3.76924600  | -2.23879500 | 0.80395600  |
| C | 1.35836500  | -2.95551200 | 0.54782700  |
| C | 4.40928000  | -0.84529700 | 0.89626300  |
| C | 3.51748400  | 1.44068900  | 0.28077500  |
| C | 0.35623700  | 1.70433000  | -2.67938100 |
| H | 0.43984400  | 2.59155500  | -0.69244300 |
| C | -2.38196300 | -0.55643700 | -3.81088600 |
| C | -0.42101800 | 0.95731400  | -3.51415500 |
| H | -4.10545700 | -1.83367800 | -3.90543700 |
| H | 3.93418600  | -2.84342400 | 1.70065900  |
| H | 4.13469600  | -2.80955200 | -0.06055300 |
| C | 0.82697400  | -3.47974900 | 1.74224900  |
| C | 0.98173900  | -3.46139200 | -0.71189000 |
| H | 5.29836700  | -0.74178400 | 0.26688400  |
| H | 4.69160300  | -0.58457700 | 1.92519200  |
| C | 3.25238100  | 2.30011900  | 1.36379700  |
| C | 4.01801200  | 1.92765000  | -0.94165400 |
| H | 1.19841900  | 2.28107900  | -3.05282000 |
| H | -2.16262700 | -0.62494300 | -4.87479200 |
| H | -0.21411600 | 0.90694700  | -4.58119300 |
| C | 1.22043200  | -2.91557500 | 3.08724100  |
| C | -0.09758100 | -4.52676700 | 1.65597200  |
| C | 1.53696700  | -2.88830700 | -1.99435800 |
| C | 0.05061300  | -4.50622100 | -0.75285900 |
| C | 2.69720300  | 1.77396900  | 2.66603200  |
| C | 3.49278000  | 3.66941600  | 1.19668600  |
| C | 4.27345200  | 0.99737100  | -2.10401000 |
| C | 4.24855800  | 3.30263600  | -1.06612800 |
| H | 0.61705300  | -3.36136500 | 3.88365300  |
| H | 2.27407800  | -3.11099100 | 3.32573200  |
| H | 1.07834800  | -1.83007500 | 3.11858700  |
| C | -0.48461700 | -5.03783000 | 0.41840600  |
| H | -0.51949600 | -4.93738200 | 2.56988700  |
| H | 2.62651100  | -2.77489300 | -1.95884200 |
| H | 1.11774000  | -1.89415200 | -2.19135400 |

|   |             |             |             |
|---|-------------|-------------|-------------|
| H | 1.29197300  | -3.53482200 | -2.84266800 |
| H | -0.25367500 | -4.90361000 | -1.71777800 |
| H | 3.33529500  | 0.99536200  | 3.10162900  |
| H | 1.70523600  | 1.33113900  | 2.51621500  |
| H | 2.60536100  | 2.57950100  | 3.40080400  |
| C | 3.98886000  | 4.16946400  | -0.00591900 |
| H | 3.28755500  | 4.34616000  | 2.02238500  |
| H | 3.36393500  | 0.45062400  | -2.37643000 |
| H | 5.04343600  | 0.25002100  | -1.87423700 |
| H | 4.61234500  | 1.55814000  | -2.98066200 |
| H | 4.63184000  | 3.69283400  | -2.00581000 |
| H | -1.20476200 | -5.85011200 | 0.36690300  |
| H | 4.17206900  | 5.23492200  | -0.11703700 |

### TS1a

|    |             |             |             |
|----|-------------|-------------|-------------|
| Ni | -0.68752900 | 0.01819300  | -0.12852600 |
| Si | 1.37022800  | 1.55279400  | -0.78669200 |
| Si | -0.01826700 | 2.24439800  | 1.07939300  |
| C  | 3.82557900  | 0.05846900  | -0.82569200 |
| C  | 2.47986600  | 0.01374100  | -0.48275400 |
| C  | 2.00143000  | -1.18883700 | 0.12323600  |
| C  | 2.89490900  | -2.27741800 | 0.38957200  |
| C  | 4.25547000  | -2.16972500 | 0.00247600  |
| C  | 4.71027600  | -1.02340600 | -0.60372800 |
| H  | 4.23120200  | 0.95866600  | -1.27808100 |
| C  | 2.38988600  | -3.43228500 | 1.03749300  |
| H  | 4.92407600  | -3.00460900 | 0.19808200  |
| H  | 5.75147600  | -0.93590600 | -0.90249200 |
| C  | 1.06275400  | -3.48048300 | 1.39188200  |
| C  | 0.23566400  | -2.38450000 | 1.07426800  |
| H  | 3.06097300  | -4.26169100 | 1.24704000  |
| H  | 0.63620400  | -4.34164300 | 1.89624800  |
| H  | -0.82309700 | -2.40879300 | 1.31451800  |
| N  | 0.66420800  | -1.28522900 | 0.45756500  |
| C  | 2.62366700  | 3.02167200  | -0.70065600 |
| H  | 3.23249000  | 3.01620100  | 0.20917800  |
| H  | 3.30329600  | 3.01018700  | -1.56300300 |
| H  | 2.09067500  | 3.98049300  | -0.73537500 |
| C  | 0.83835100  | 1.70174200  | -2.61584700 |
| H  | 1.73892900  | 1.82076300  | -3.23240200 |
| H  | 0.27274200  | 0.85043400  | -2.99622500 |
| H  | 0.22794800  | 2.60352800  | -2.75138600 |
| C  | -1.16749900 | 3.66458700  | 0.54505700  |
| H  | -1.64614400 | 4.12203800  | 1.42119200  |
| H  | -0.60820200 | 4.45476900  | 0.02899600  |
| H  | -1.95609100 | 3.31721500  | -0.12956200 |
| C  | -0.95861300 | 0.99816700  | 2.19942000  |
| H  | -0.24663900 | 0.54579800  | 2.89889900  |
| H  | -1.68808300 | 1.58166600  | 2.77737600  |
| H  | -1.52665500 | 0.17898500  | 1.72914800  |
| C  | 1.23103400  | 2.99017300  | 2.32127200  |
| H  | 0.69896500  | 3.29946400  | 3.23092300  |
| H  | 1.99797700  | 2.26475700  | 2.61861500  |
| H  | 1.74264600  | 3.86982600  | 1.91780700  |
| C  | -3.63190200 | 0.78227800  | -0.91339700 |
| C  | -4.07867800 | 0.47316900  | 0.53117000  |
| C  | -2.21722900 | -2.15591600 | -1.62737500 |
| C  | -3.87495800 | -0.90448000 | 1.11422600  |
| C  | -3.60865600 | -2.34441000 | -0.98357800 |
| C  | -3.67691400 | -2.07797500 | 0.49957700  |
| H  | -3.80606800 | 1.85897800  | -1.04397000 |
| H  | -5.14951900 | 0.72465100  | 0.61386900  |
| H  | -1.50994200 | -2.85275400 | -1.15211400 |

|   |             |             |             |
|---|-------------|-------------|-------------|
| H | -3.90902000 | -3.38610200 | -1.15820000 |
| H | -4.32435200 | 0.30499200  | -1.61950900 |
| H | -3.57484200 | 1.18386600  | 1.19866100  |
| H | -2.30314500 | -2.50678100 | -2.66829400 |
| H | -3.91453800 | -0.92418700 | 2.20528600  |
| H | -4.33897000 | -1.73142600 | -1.51851800 |
| H | -3.55158100 | -2.95461200 | 1.13801300  |
| C | -2.18174100 | 0.50767100  | -1.33940700 |
| C | -1.60377400 | -0.75777300 | -1.66792400 |
| H | -1.81023100 | 1.32573000  | -1.96047900 |
| H | -0.84211600 | -0.72474600 | -2.45202200 |

### TS1c

|    |             |             |             |
|----|-------------|-------------|-------------|
| C  | -3.44470800 | 1.61457300  | 1.64354900  |
| C  | -2.33079900 | 1.42000300  | 0.83974800  |
| C  | -2.56302800 | 1.05987700  | -0.52452600 |
| C  | -3.89304800 | 0.99246500  | -1.04881400 |
| C  | -4.98974500 | 1.20362900  | -0.17367700 |
| C  | -4.76786400 | 1.49031700  | 1.15375000  |
| H  | -3.31006600 | 1.89804500  | 2.68582800  |
| C  | -4.06044800 | 0.72464200  | -2.43168300 |
| H  | -6.00004600 | 1.13975100  | -0.57144900 |
| H  | -5.60784000 | 1.65083000  | 1.82533200  |
| C  | -2.95114100 | 0.52694600  | -3.21937300 |
| C  | -1.67521000 | 0.55077000  | -2.61386800 |
| H  | -5.06347000 | 0.68434400  | -2.85037700 |
| H  | -3.03486500 | 0.33508500  | -4.28489400 |
| H  | -0.78789600 | 0.35680700  | -3.21144600 |
| N  | -1.47074300 | 0.78719900  | -1.32602800 |
| Si | -0.52234200 | 1.79473300  | 1.42087400  |
| Si | 1.24867000  | 2.56022100  | -0.61654900 |
| C  | -0.68432700 | 3.65564400  | 1.89846400  |
| H  | -1.13713800 | 4.25833300  | 1.10626000  |
| H  | -1.33251600 | 3.73311400  | 2.78253800  |
| H  | 0.27752200  | 4.11211000  | 2.16200900  |
| C  | -0.22219800 | 1.04830100  | 3.16425400  |
| H  | -1.09382300 | 1.20921300  | 3.81491900  |
| H  | 0.00319400  | -0.01984100 | 3.14721300  |
| H  | 0.62523400  | 1.56392700  | 3.63454900  |
| C  | 2.74693400  | 3.27808300  | 0.33020200  |
| H  | 3.48217000  | 2.50199200  | 0.56619700  |
| H  | 3.24956100  | 4.04131700  | -0.28054900 |
| H  | 2.45013500  | 3.75670100  | 1.27102600  |
| C  | 1.93658600  | 1.71997200  | -2.22084600 |
| H  | 2.15734000  | 0.65161600  | -2.12345400 |
| H  | 1.23524100  | 1.85412500  | -3.05312900 |
| H  | 2.88089400  | 2.21322500  | -2.49140300 |
| C  | 0.32792200  | 4.09200100  | -1.31352500 |
| H  | 0.93001900  | 4.52884300  | -2.12259500 |
| H  | -0.64974500 | 3.83026700  | -1.73580200 |
| H  | 0.17373100  | 4.87465800  | -0.56451100 |
| Ni | 0.31555700  | 0.56455300  | -0.21091300 |
| C  | 0.90156000  | -1.22729100 | 0.27385400  |
| N  | 0.09061300  | -2.25839300 | 0.69088300  |
| N  | 2.17737600  | -1.71109600 | 0.36123200  |
| C  | 0.81785200  | -3.50923400 | 1.00029100  |
| C  | -1.31224300 | -2.38846900 | 0.40259300  |
| C  | 2.28032900  | -3.06338900 | 0.94691600  |
| C  | 3.40391200  | -1.02061800 | 0.08099600  |
| H  | 0.58597600  | -4.27667700 | 0.25062300  |
| H  | 0.52437900  | -3.90109000 | 1.97980700  |
| C  | -2.24621400 | -2.38651000 | 1.45407700  |

|   |             |             |             |
|---|-------------|-------------|-------------|
| C | -1.71666600 | -2.65484500 | -0.92631700 |
| H | 2.73830600  | -3.00977800 | 1.94320000  |
| C | 4.01866800  | -0.24704500 | 1.08367400  |
| C | 4.03014800  | -1.24147200 | -1.16180500 |
| C | -3.59896000 | -2.59784800 | 1.14942500  |
| C | -1.85233800 | -2.17889800 | 2.89723700  |
| C | -3.07482300 | -2.85138300 | -1.18688400 |
| C | -0.71378000 | -2.75914400 | -2.05077700 |
| C | 5.27130500  | 0.31728600  | 0.81365700  |
| C | 3.33755000  | -0.00435000 | 2.40656900  |
| C | 5.27874200  | -0.65287900 | -1.39448100 |
| C | 3.38433600  | -2.09785500 | -2.22623200 |
| C | -4.01589500 | -2.81810300 | -0.15748100 |
| H | -4.32655200 | -2.58887700 | 1.95766300  |
| H | -2.29495900 | -2.95456100 | 3.53374800  |
| H | -0.77027400 | -2.19407600 | 3.03501100  |
| H | -2.21387700 | -1.21104900 | 3.26205600  |
| H | -3.39405400 | -3.04548300 | -2.20774900 |
| H | -1.22146700 | -2.94103800 | -3.00299100 |
| H | -0.12107700 | -1.84404400 | -2.14171900 |
| H | -0.00768800 | -3.58448300 | -1.89222600 |
| C | 5.89876200  | 0.11926400  | -0.41471300 |
| H | 5.75416800  | 0.91895500  | 1.57959400  |
| H | 2.40033700  | 0.53936600  | 2.25172700  |
| H | 3.08696000  | -0.93958900 | 2.92190400  |
| H | 3.97746300  | 0.58326700  | 3.07207200  |
| H | 5.76672300  | -0.80846500 | -2.35348400 |
| H | 2.36267000  | -1.77076700 | -2.44395900 |
| H | 3.96081800  | -2.05704400 | -3.15547800 |
| H | 3.32387900  | -3.15135300 | -1.92298900 |
| H | -5.06858600 | -2.97766000 | -0.37564000 |
| H | 6.87054800  | 0.56593000  | -0.60775600 |

### INT2a

|    |             |             |             |
|----|-------------|-------------|-------------|
| C  | -3.85311200 | -0.43718100 | -1.29901700 |
| C  | -2.56283700 | -0.19871700 | -0.85253800 |
| C  | -2.33494600 | 0.99495900  | -0.10497700 |
| C  | -3.40562500 | 1.89969100  | 0.18009200  |
| C  | -4.70291900 | 1.60557600  | -0.31543900 |
| C  | -4.92052700 | 0.45915000  | -1.04397700 |
| H  | -4.06751600 | -1.34294200 | -1.86186600 |
| C  | -3.12772700 | 3.05109600  | 0.95835600  |
| H  | -5.51512100 | 2.29691300  | -0.10431500 |
| H  | -5.91463100 | 0.23201500  | -1.41994200 |
| C  | -1.84852500 | 3.26439300  | 1.41470300  |
| C  | -0.84097300 | 2.33495100  | 1.07786900  |
| H  | -3.93004500 | 3.74881700  | 1.18630600  |
| H  | -1.59439600 | 4.13010500  | 2.01787700  |
| H  | 0.17808400  | 2.49350600  | 1.41465500  |
| N  | -1.05309400 | 1.24652000  | 0.34879000  |
| Si | -1.06258400 | -1.35399100 | -1.15112300 |
| Si | -0.05492900 | -1.76259300 | 1.43042900  |
| C  | -1.72829700 | -3.14402000 | -1.23004100 |
| H  | -2.18577000 | -3.49948100 | -0.30261600 |
| H  | -2.48148500 | -3.21937000 | -2.02604000 |
| H  | -0.91829600 | -3.83547700 | -1.49138700 |
| C  | -0.48401600 | -1.05907800 | -2.95691500 |
| H  | -1.31478200 | -1.26155900 | -3.64691100 |
| H  | -0.14555100 | -0.03192500 | -3.12706000 |
| H  | 0.33893400  | -1.73509200 | -3.21879800 |
| C  | 0.64902500  | -3.53534400 | 1.34487500  |
| H  | 1.64644300  | -3.56613000 | 0.89269100  |
| H  | 0.73145300  | -3.95180200 | 2.35822700  |

|    |             |             |             |
|----|-------------|-------------|-------------|
| H  | 2.90675100  | -3.71338600 | 0.32720200  |
| H  | 0.00344000  | -4.20548300 | 0.76750800  |
| C  | 0.97191300  | -0.82720700 | 2.76792600  |
| H  | 0.53184000  | 0.14906700  | 3.00250300  |
| H  | 0.95346000  | -1.42590300 | 3.69043800  |
| H  | 2.02089900  | -0.67147600 | 2.49694100  |
| C  | -1.78208400 | -1.90101100 | 2.24587400  |
| H  | -1.68831700 | -2.41076200 | 3.21457200  |
| H  | -2.20609300 | -0.90768400 | 2.43529400  |
| H  | -2.51142200 | -2.45960300 | 1.65020800  |
| C  | 3.36900700  | -1.17064600 | -0.11308600 |
| C  | 4.59149600  | -0.37014200 | 0.40746900  |
| C  | 2.65149700  | 2.02076900  | 0.08231900  |
| C  | 5.29598700  | 0.45620000  | -0.64075700 |
| C  | 3.91494700  | 2.63636300  | -0.56923400 |
| C  | 5.00853100  | 1.70256500  | -1.03544200 |
| H  | 2.96107700  | -1.72377500 | 0.73963600  |
| H  | 5.30335100  | -1.10023200 | 0.81536200  |
| H  | 2.88578500  | 1.62536000  | 1.07453100  |
| H  | 4.34291100  | 3.38179900  | 0.12202500  |
| H  | 3.74488400  | -1.93987900 | -0.80165600 |
| H  | 4.29551500  | 0.25291800  | 1.25604600  |
| H  | 1.95696200  | 2.85605200  | 0.25045200  |
| H  | 6.12804700  | -0.03975600 | -1.14233100 |
| H  | 3.58821500  | 3.21694700  | -1.44446300 |
| H  | 5.64833100  | 2.13097800  | -1.80865700 |
| C  | 2.27520700  | -0.40037700 | -0.86189100 |
| C  | 1.97486200  | 0.97953000  | -0.79035100 |
| Ni | 0.42733300  | -0.10738500 | -0.06463800 |
| H  | 2.04787600  | -0.85620100 | -1.82445200 |
| H  | 1.55215300  | 1.41423400  | -1.70165100 |

### INT2b

|    |             |             |             |
|----|-------------|-------------|-------------|
| C  | 3.62733300  | 1.52566500  | 0.87427900  |
| C  | 2.41188100  | 1.03950100  | 0.41483000  |
| C  | 2.45403300  | 0.09291000  | -0.65650200 |
| C  | 3.70210200  | -0.29207100 | -1.24991700 |
| C  | 4.90763100  | 0.25064100  | -0.73532300 |
| C  | 4.86922000  | 1.13654700  | 0.31628800  |
| H  | 3.63742600  | 2.24339200  | 1.69205900  |
| C  | 3.68603300  | -1.20651400 | -2.33167300 |
| H  | 5.85197800  | -0.04685500 | -1.18470300 |
| H  | 5.79197800  | 1.55043400  | 0.71491600  |
| C  | 2.48694200  | -1.70904700 | -2.78130500 |
| C  | 1.30405100  | -1.31157000 | -2.12616100 |
| H  | 4.62571400  | -1.50171200 | -2.79274100 |
| H  | 2.43364200  | -2.41112200 | -3.60707200 |
| H  | 0.34901200  | -1.72692800 | -2.43761700 |
| N  | 1.27035400  | -0.45787100 | -1.11192400 |
| Si | 0.69879000  | 1.59757300  | 1.10590500  |
| Si | -0.47716100 | -1.95347500 | 1.52706500  |
| C  | 0.86779200  | 1.72400900  | 3.00621400  |
| H  | 1.07807900  | 0.75385900  | 3.46860400  |
| H  | 1.66182900  | 2.42110900  | 3.30774600  |
| H  | -0.07092400 | 2.09541000  | 3.43732400  |
| C  | 0.55528100  | 3.42744400  | 0.52253500  |
| H  | 1.39256200  | 4.03124900  | 0.89993500  |
| H  | 0.55478300  | 3.50968700  | -0.57132800 |
| H  | -0.37165000 | 3.88555100  | 0.89118700  |
| C  | -1.66277700 | -1.76498700 | 3.02193600  |
| H  | -2.70503300 | -1.64638900 | 2.69925800  |
| H  | -1.61682600 | -2.64336900 | 3.68126400  |
| H  | -1.40599300 | -0.88390500 | 3.62249100  |

|    |             |             |             |
|----|-------------|-------------|-------------|
| C  | -0.96025600 | -3.61785800 | 0.68268600  |
| H  | -0.89096500 | -4.45130000 | 1.39640000  |
| H  | -1.98511400 | -3.60860000 | 0.29051900  |
| C  | 1.26359700  | -2.28912600 | 2.25377700  |
| H  | 1.24746900  | -3.16018900 | 2.92385800  |
| H  | 1.99134500  | -2.49619100 | 1.45909900  |
| H  | 1.64266400  | -1.43520400 | 2.82645400  |
| C  | -4.72823900 | -0.13368300 | -0.55522300 |
| C  | -3.73609800 | -1.23258400 | -0.99259100 |
| C  | -2.90879400 | 2.52925700  | -1.00189700 |
| C  | -2.43490500 | -0.81199000 | -1.63690000 |
| C  | -2.87142800 | 1.65359600  | -2.27477200 |
| C  | -2.06388500 | 0.37430200  | -2.16842800 |
| H  | -5.60008100 | -0.64070000 | -0.12369900 |
| H  | -4.25011900 | -1.91382800 | -1.68988700 |
| H  | -1.89143900 | 2.88849800  | -0.80461100 |
| H  | -2.42845700 | 2.26352700  | -3.07135800 |
| H  | -5.10487200 | 0.40221000  | -1.43022100 |
| H  | -3.48780700 | -1.84904300 | -0.11904700 |
| H  | -3.49811000 | 3.43290100  | -1.22664900 |
| H  | -1.73987100 | -1.64495900 | -1.75397900 |
| H  | -3.88914200 | 1.43225000  | -2.60686200 |
| H  | -1.08337800 | 0.40943600  | -2.64318800 |
| C  | -4.16948200 | 0.82065200  | 0.47631300  |
| C  | -3.42087700 | 1.91404000  | 0.27779500  |
| Ni | -0.48211200 | -0.10601400 | 0.04045200  |
| H  | -4.39539200 | 0.56458700  | 1.51124900  |
| H  | -3.12498200 | 2.46786100  | 1.16927000  |

### INT2c

|    |             |             |             |
|----|-------------|-------------|-------------|
| C  | -3.34169700 | 1.69131400  | 1.75012100  |
| C  | -2.26625100 | 1.45950800  | 0.90491000  |
| C  | -2.56260500 | 1.09303700  | -0.44504200 |
| C  | -3.91522300 | 1.05002800  | -0.91296000 |
| C  | -4.97001700 | 1.29421600  | 0.00408900  |
| C  | -4.68674800 | 1.59260700  | 1.31707800  |
| H  | -3.15717700 | 1.98199200  | 2.78277000  |
| C  | -4.14678400 | 0.77336000  | -2.28461400 |
| H  | -5.99716100 | 1.24710200  | -0.35062100 |
| H  | -5.49427300 | 1.77969800  | 2.02086900  |
| C  | -3.07644100 | 0.54716000  | -3.11676700 |
| C  | -1.77602500 | 0.55224000  | -2.56505300 |
| H  | -5.16747000 | 0.75056900  | -2.65981300 |
| H  | -3.20869600 | 0.34827700  | -4.17607100 |
| H  | -0.91902400 | 0.34071400  | -3.20024500 |
| N  | -1.51171700 | 0.79334100  | -1.28983000 |
| Si | -0.42432000 | 1.76704800  | 1.41931400  |
| Si | 1.25347700  | 2.55104000  | -0.71757200 |
| C  | -0.49803200 | 3.63090200  | 1.91482700  |
| H  | -0.92424400 | 4.26520300  | 1.13186600  |
| H  | -1.13286700 | 3.73885800  | 2.80548300  |
| H  | 0.48956200  | 4.03321500  | 2.17305600  |
| C  | -0.12127600 | 1.00944800  | 3.16080500  |
| H  | -0.97829700 | 1.19862000  | 3.82325000  |
| H  | 0.06731600  | -0.06651700 | 3.14387100  |
| H  | 0.74723500  | 1.49759900  | 3.62169800  |
| C  | 2.80984400  | 3.30535700  | 0.08885600  |
| H  | 3.52366200  | 2.52634300  | 0.37498900  |
| H  | 3.31407800  | 3.98414200  | -0.61338700 |
| H  | 2.56532900  | 3.88747200  | 0.98538600  |
| C  | 1.81307700  | 1.48814900  | -2.23751900 |
| H  | 1.41835600  | 0.45459900  | -2.22828600 |
| H  | 1.45709900  | 1.95193000  | -3.16621000 |

|    |             |             |             |
|----|-------------|-------------|-------------|
| H  | -0.28941600 | -3.85036200 | -0.15520700 |
| H  | 2.90354100  | 1.39576100  | -2.27081400 |
| C  | 0.30419100  | 4.03825000  | -1.46168000 |
| H  | 0.89771600  | 4.48032500  | -2.27411400 |
| H  | -0.66234900 | 3.73680000  | -1.88200200 |
| H  | 0.12044100  | 4.82889600  | -0.72715900 |
| Ni | 0.36490400  | 0.57388400  | -0.26431700 |
| C  | 0.87997800  | -1.22396600 | 0.27025500  |
| N  | 0.05466100  | -2.24582500 | 0.67726300  |
| N  | 2.15188500  | -1.70699900 | 0.40662600  |
| C  | 0.77010700  | -3.49587400 | 1.01814200  |
| C  | -1.34281900 | -2.37728800 | 0.36266400  |
| C  | 2.23490300  | -3.05321700 | 1.00788900  |
| C  | 3.38226200  | -1.02609200 | 0.11700200  |
| H  | 0.56021900  | -4.26832100 | 0.26701400  |
| H  | 0.44560600  | -3.88079700 | 1.99041600  |
| C  | -2.29759100 | -2.35947100 | 1.39567600  |
| C  | -1.72041800 | -2.66497400 | -0.96887800 |
| H  | 2.87878500  | -3.70909400 | 0.41247900  |
| H  | 2.66012700  | -2.99352700 | 2.01783000  |
| C  | 4.02755900  | -0.28270500 | 1.12383900  |
| C  | 3.98199300  | -1.22509200 | -1.14266200 |
| C  | -3.64236400 | -2.58611200 | 1.06873300  |
| C  | -1.93530100 | -2.10204000 | 2.83867400  |
| C  | -3.07231200 | -2.87552700 | -1.25243400 |
| C  | -0.69657900 | -2.76972900 | -2.07398100 |
| C  | 5.27386000  | 0.28721700  | 0.83609800  |
| C  | 3.39807400  | -0.09550300 | 2.48123900  |
| C  | 5.22747800  | -0.63569700 | -1.39099500 |
| C  | 3.31551500  | -2.06309500 | -2.20831800 |
| C  | -4.03265200 | -2.83313500 | -0.24205500 |
| H  | -4.38553300 | -2.56771200 | 1.86234200  |
| H  | -2.51821100 | -2.74932200 | 3.50370300  |
| H  | -0.87481500 | -2.26674500 | 3.03762900  |
| H  | -2.15660200 | -1.06433200 | 3.11110200  |
| H  | -3.37036400 | -3.08810000 | -2.27605900 |
| H  | -1.18113400 | -3.00445200 | -3.02673400 |
| H  | -0.13968800 | -1.83469000 | -2.18789600 |
| H  | 0.04085700  | -3.55793200 | -1.87621800 |
| C  | 5.87099300  | 0.11719000  | -0.41119800 |
| H  | 5.77665200  | 0.86954400  | 1.60419200  |
| H  | 2.37712500  | 0.28161800  | 2.38538100  |
| H  | 3.34951500  | -1.03736800 | 3.04375700  |
| H  | 3.97571200  | 0.61405400  | 3.08175300  |
| H  | 5.69524500  | -0.77712400 | -2.36221000 |
| H  | 2.32830700  | -1.67079700 | -2.47149800 |
| H  | 3.92458400  | -2.08521300 | -3.11723200 |
| H  | 3.17057100  | -3.10064800 | -1.88159500 |
| H  | -5.07956300 | -3.00638200 | -0.47706800 |
| H  | 6.83831100  | 0.56735500  | -0.61798600 |

### INT3a

|   |             |             |             |
|---|-------------|-------------|-------------|
| C | -2.77640000 | -1.88096000 | -0.80261600 |
| C | -1.70910400 | -1.01872900 | -0.60901500 |
| C | -1.99731000 | 0.28171900  | -0.09921000 |
| C | -3.33996200 | 0.67993900  | 0.18943600  |
| C | -4.39208800 | -0.24559400 | -0.03886600 |
| C | -4.11344000 | -1.50257300 | -0.52421200 |
| H | -2.59418300 | -2.88474200 | -1.17984500 |
| C | -3.56084900 | 1.98343700  | 0.69947900  |
| H | -5.41368500 | 0.05565900  | 0.17971500  |
| H | -4.91904700 | -2.21192500 | -0.69461000 |
| C | -2.48887000 | 2.82160000  | 0.89933600  |

|   |             |            |            |
|---|-------------|------------|------------|
| C | -1.19239700 | 2.35852300 | 0.58837400 |
| H | -4.57498600 | 2.30431300 | 0.92563000 |

|    |             |             |             |
|----|-------------|-------------|-------------|
| H  | -2.61599400 | 3.82690200  | 1.28776700  |
| H  | -0.33042100 | 3.00160800  | 0.73135200  |
| N  | -0.93908900 | 1.14439500  | 0.11465900  |
| Si | 0.12989700  | -1.41024900 | -0.96892100 |
| Si | 1.40145900  | -0.82097600 | 1.55237300  |
| C  | 0.38308900  | -3.28782100 | -0.72982200 |
| H  | 0.20757600  | -3.64441400 | 0.28907300  |
| H  | -0.29558800 | -3.83490700 | -1.39838600 |
| H  | 1.40433300  | -3.56958500 | -1.01285400 |
| C  | 0.41644500  | -1.16715400 | -2.84775000 |
| H  | -0.19822600 | -1.87104900 | -3.42597300 |
| H  | 0.17202900  | -0.14974800 | -3.16876700 |
| H  | 1.46827000  | -1.35108200 | -3.09752100 |
| C  | 2.81838300  | -2.09906300 | 1.54537100  |
| H  | 3.71457700  | -1.70090500 | 1.05630900  |
| H  | 3.09083000  | -2.35141200 | 2.57938100  |
| H  | 2.54949400  | -3.03114200 | 1.03865600  |
| C  | 2.02486400  | 0.62284500  | 2.65547100  |
| H  | 1.26644900  | 1.40583800  | 2.77279900  |
| H  | 2.26618500  | 0.23892100  | 3.65764200  |
| H  | 2.92399500  | 1.08968100  | 2.23975600  |
| C  | -0.04090300 | -1.57619100 | 2.55837400  |
| H  | 0.31217500  | -1.82599800 | 3.56836000  |
| H  | -0.86304400 | -0.85838900 | 2.66484700  |
| H  | -0.45747900 | -2.48862500 | 2.11981100  |
| Ni | 0.96455900  | 0.53066000  | -0.23093700 |
| C  | 1.93357100  | 2.00728100  | -0.97308700 |
| C  | 2.67088300  | 0.96065200  | -0.90794700 |
| C  | 1.80776300  | 3.43569800  | -1.37052500 |
| H  | 0.85017700  | 3.63874400  | -1.86575800 |
| H  | 1.85776800  | 4.09426200  | -0.49257500 |
| H  | 2.61160400  | 3.74380500  | -2.05383900 |
| C  | 3.99586400  | 0.33426900  | -1.15996200 |
| H  | 3.89425200  | -0.64683900 | -1.63771900 |
| H  | 4.62237500  | 0.96616200  | -1.80449700 |
| H  | 4.54032300  | 0.17550500  | -0.22042100 |

### INT3b

|    |             |             |             |
|----|-------------|-------------|-------------|
| C  | 3.13575200  | -1.43293100 | 0.28329300  |
| C  | 1.91132100  | -0.78853600 | 0.37769100  |
| C  | 1.86006300  | 0.57804600  | -0.03568500 |
| C  | 3.03877600  | 1.26159900  | -0.47704500 |
| C  | 4.26242300  | 0.54590900  | -0.54316400 |
| C  | 4.30505200  | -0.78053900 | -0.17912300 |
| H  | 3.21515200  | -2.47639800 | 0.58100100  |
| C  | 2.93273100  | 2.63037700  | -0.82851200 |
| H  | 5.15654700  | 1.06238900  | -0.88387100 |
| H  | 5.24115700  | -1.33043700 | -0.23355800 |
| C  | 1.71339600  | 3.26310300  | -0.74060800 |
| C  | 0.59101000  | 2.51522600  | -0.32918600 |
| H  | 3.81902300  | 3.16545500  | -1.16159200 |
| H  | 1.59528700  | 4.31150300  | -0.99519300 |
| H  | -0.39061000 | 2.97831600  | -0.27492300 |
| N  | 0.64427800  | 1.23097300  | -0.00200200 |
| Si | 0.29611200  | -1.57545300 | 1.06139100  |
| Si | -1.51878700 | -0.91080100 | -1.68187000 |
| C  | 0.28287700  | -3.42516400 | 0.58120600  |
| H  | 0.22297000  | -3.59820500 | -0.49738400 |
| H  | 1.18017200  | -3.93750700 | 0.95538400  |
| H  | -0.58259900 | -3.91830200 | 1.04212800  |

|    |             |             |             |
|----|-------------|-------------|-------------|
| C  | 0.55623100  | -1.62106900 | 2.96885900  |
| H  | 1.41715600  | -2.25263600 | 3.22982300  |
| H  | 0.73674300  | -0.62211600 | 3.38102500  |
| H  | -0.32524900 | -2.03737700 | 3.47311100  |
| C  | -2.70290700 | -2.40565400 | -1.53249800 |
| H  | -3.63813400 | -2.11839400 | -1.03539400 |
| H  | -2.96300800 | -2.80261400 | -2.52387200 |
| H  | -2.25905500 | -3.21997000 | -0.94969300 |
| C  | -2.40343600 | 0.32218800  | -2.86600800 |
| H  | -1.82477900 | 1.24379000  | -3.00622100 |
| H  | -2.53135500 | -0.14017000 | -3.85584200 |
| H  | -3.39756500 | 0.60406700  | -2.50220400 |
| C  | 0.01020900  | -1.45934500 | -2.69447500 |
| H  | -0.31164400 | -1.87697100 | -3.65895400 |
| H  | 0.66050200  | -0.60174100 | -2.90760400 |
| H  | 0.62326900  | -2.21405400 | -2.19236600 |
| Ni | -1.11615500 | 0.15329100  | 0.39594700  |
| C  | -2.13606100 | 1.17069700  | 1.94420900  |
| C  | -2.66042300 | 1.51381600  | 0.86574200  |
| C  | -1.87165700 | 1.09865800  | 3.39521600  |
| H  | -1.94848100 | 0.07064600  | 3.76251400  |
| H  | -0.86259500 | 1.45393300  | 3.63131100  |
| H  | -2.59013200 | 1.71841500  | 3.95034800  |
| C  | -3.61774400 | 2.21850600  | -0.01652700 |
| H  | -4.32094000 | 1.51238300  | -0.47088000 |
| H  | -4.19720900 | 2.95814200  | 0.55316100  |
| H  | -3.11044900 | 2.73710800  | -0.83634700 |

### INT3c

|    |             |             |             |
|----|-------------|-------------|-------------|
| C  | -3.38543900 | -1.92236400 | -1.14240000 |
| C  | -2.37185700 | -1.05149300 | -0.77544700 |
| C  | -2.74916200 | 0.26022900  | -0.36212100 |
| C  | -4.12232000 | 0.65885100  | -0.33480000 |
| C  | -5.11413300 | -0.27564100 | -0.73280500 |
| C  | -4.75058200 | -1.54225900 | -1.12823800 |
| H  | -3.13785500 | -2.93513500 | -1.45254000 |
| C  | -4.43479100 | 1.97119000  | 0.09836400  |
| H  | -6.15839900 | 0.02644200  | -0.71460100 |
| H  | -5.51060400 | -2.25863500 | -1.42879100 |
| C  | -3.41939900 | 2.81796900  | 0.47698800  |
| C  | -2.08737400 | 2.35547600  | 0.41852700  |
| H  | -5.47362100 | 2.29141200  | 0.12666800  |
| H  | -3.61715100 | 3.82945800  | 0.81661800  |
| H  | -1.26756900 | 3.00446800  | 0.70694600  |
| N  | -1.74960200 | 1.13442400  | 0.02134400  |
| Si | -0.49908200 | -1.44895400 | -0.78302200 |
| Si | 0.26401800  | -0.73679900 | 1.90803300  |
| C  | -0.30047400 | -3.30800000 | -0.39779300 |
| H  | -0.64767600 | -3.59798200 | 0.59790200  |
| H  | -0.86322700 | -3.89645600 | -1.13525600 |
| H  | 0.75023300  | -3.60846200 | -0.48699900 |
| C  | 0.09630500  | -1.29138100 | -2.59638200 |
| H  | -0.41685400 | -2.02754800 | -3.23065700 |
| H  | -0.10140900 | -0.29279800 | -2.99898100 |
| H  | 1.17503500  | -1.47017000 | -2.66977500 |
| C  | 1.64071800  | -2.00241800 | 2.26657300  |
| H  | 2.61882200  | -1.62244300 | 1.95307500  |
| H  | 1.68547600  | -2.18719300 | 3.34870400  |
| H  | 1.48128100  | -2.96722300 | 1.77441600  |
| C  | 0.66627500  | 0.77341500  | 3.02213300  |

|    |             |             |             |
|----|-------------|-------------|-------------|
| H  | -0.08585800 | 1.56620500  | 2.93612600  |
| H  | 1.64103100  | 1.20494600  | 2.77221800  |
| H  | -1.20905100 | -1.66161100 | 3.70182000  |
| H  | -2.17135000 | -0.69949100 | 2.57061300  |
| H  | -1.71269200 | -2.35385100 | 2.15400300  |
| Ni | 0.18678500  | 0.53533500  | 0.00727000  |
| C  | 1.21056700  | 2.02523400  | -0.59311300 |
| C  | 1.97001700  | 1.00063600  | -0.40599600 |
| C  | 1.10402700  | 3.43685900  | -1.04774400 |
| H  | 0.12532000  | 3.65600700  | -1.49171400 |
| H  | 1.23650200  | 4.12892400  | -0.20391300 |
| H  | 1.87474300  | 3.68204500  | -1.79186000 |
| C  | 3.33391800  | 0.49759800  | -0.46541500 |
| C  | 4.41730200  | 1.39992400  | -0.44245200 |
| C  | 3.61722800  | -0.87598300 | -0.56547300 |
| C  | 5.73070100  | 0.94227900  | -0.51896500 |
| H  | 4.21483400  | 2.46411500  | -0.35826700 |
| C  | 4.93199800  | -1.33244600 | -0.64962600 |
| H  | 2.79068900  | -1.57929400 | -0.57555700 |
| C  | 5.99466500  | -0.42633300 | -0.62505800 |
| H  | 6.55146700  | 1.65496800  | -0.49627600 |
| H  | 5.12780800  | -2.39866500 | -0.73123000 |
| H  | 7.01957900  | -0.78261400 | -0.68578800 |

### INT3d

|    |             |             |             |
|----|-------------|-------------|-------------|
| C  | -3.59505100 | 1.35871300  | -1.20739900 |
| C  | -2.37169000 | 0.84964800  | -0.80192900 |
| C  | -1.55906500 | 1.67380000  | 0.03151100  |
| C  | -1.99142800 | 2.97762700  | 0.42694300  |
| C  | -3.25193300 | 3.44675100  | -0.02768400 |
| C  | -4.03769100 | 2.65087100  | -0.82920000 |
| H  | -4.24699000 | 0.75554400  | -1.83538400 |
| C  | -1.14173800 | 3.74353500  | 1.26339300  |
| H  | -3.58250400 | 4.43860300  | 0.27082100  |
| H  | -5.00397000 | 3.00973100  | -1.17366300 |
| C  | 0.06454300  | 3.21900500  | 1.66483800  |
| C  | 0.42727600  | 1.92637300  | 1.22903300  |
| H  | -1.45380400 | 4.73735800  | 1.57561300  |
| H  | 0.74468200  | 3.77456400  | 2.30215000  |
| H  | 1.38202800  | 1.49783900  | 1.51475700  |
| N  | -0.34211600 | 1.17285200  | 0.45216700  |
| Si | -1.66533000 | -0.87003200 | -1.25775300 |
| Si | -1.07252300 | -1.98500300 | 1.34424500  |
| C  | -3.13361800 | -2.06570500 | -1.49170500 |
| H  | -3.73165600 | -2.22891600 | -0.59078500 |
| H  | -3.80075800 | -1.67394200 | -2.27163000 |
| H  | -2.77619100 | -3.04239200 | -1.83906800 |
| C  | -0.90566800 | -0.74161000 | -3.01033500 |
| H  | -1.68173600 | -0.48877000 | -3.74609000 |
| H  | -0.12252700 | 0.02141900  | -3.05876200 |
| H  | -0.45715000 | -1.69773600 | -3.30528100 |
| C  | -1.37810000 | -3.83865600 | 1.01754600  |
| H  | -0.47031600 | -4.33148300 | 0.65251700  |
| H  | -1.67039400 | -4.33370000 | 1.95374600  |
| H  | -2.17175100 | -4.01958100 | 0.28603400  |
| C  | 0.19779200  | -1.91660400 | 2.78131100  |
| H  | 0.44433100  | -0.88629500 | 3.06286700  |
| H  | -0.22694900 | -2.41242300 | 3.66639800  |
| H  | 1.13287900  | -2.42245200 | 2.51891100  |
| C  | -2.67004400 | -1.26067300 | 2.10807000  |
| H  | -2.94519500 | -1.84740200 | 2.99538400  |
| H  | -2.51291400 | -0.22565900 | 2.43516900  |
| H  | -3.53075400 | -1.26271700 | 1.43186200  |

|    |             |             |             |
|----|-------------|-------------|-------------|
| H  | 0.69062100  | 0.44940800  | 4.07302700  |
| C  | -1.36185500 | -1.43611300 | 2.63740100  |
| Ni | 0.21067500  | -0.70963900 | -0.04489500 |
| C  | 2.10183300  | -0.72338400 | -0.38274200 |
| C  | 1.58288100  | -1.88891300 | -0.55387600 |
| C  | 3.29353800  | 0.10402300  | -0.36868400 |
| C  | 4.49868200  | -0.37788200 | 0.18404800  |
| C  | 3.28192900  | 1.41020100  | -0.89664900 |
| C  | 5.64417100  | 0.41539500  | 0.20204100  |
| H  | 4.52210200  | -1.38090400 | 0.60114100  |
| C  | 4.43378900  | 2.19541500  | -0.88965100 |
| H  | 2.35869100  | 1.79354300  | -1.32240600 |
| C  | 5.61954300  | 1.70462300  | -0.33723300 |
| H  | 6.56184400  | 0.02382900  | 0.63424000  |
| H  | 4.40491900  | 3.19604300  | -1.31410300 |
| H  | 6.51509300  | 2.32014400  | -0.32594700 |
| C  | 1.81188000  | -3.30192500 | -0.95625300 |
| H  | 2.78743500  | -3.42460900 | -1.44563200 |
| H  | 1.79187100  | -3.96579100 | -0.08214500 |
| H  | 1.03456300  | -3.65719600 | -1.64205200 |

### INT3e

|    |             |             |             |
|----|-------------|-------------|-------------|
| C  | -3.92425100 | -1.44215300 | -1.46307700 |
| C  | -2.75867200 | -0.91380200 | -0.93143100 |
| C  | -2.84993200 | 0.34357000  | -0.26379200 |
| C  | -4.09909300 | 1.03004100  | -0.15244100 |
| C  | -5.25688300 | 0.44122300  | -0.72540100 |
| C  | -5.16937700 | -0.77201000 | -1.36828200 |
| H  | -3.89598300 | -2.40387700 | -1.97056400 |
| C  | -4.12743500 | 2.26932900  | 0.53433700  |
| H  | -6.20712300 | 0.96309500  | -0.64310500 |
| H  | -6.05688400 | -1.22365600 | -1.80347800 |
| C  | -2.96483500 | 2.77489300  | 1.06690000  |
| C  | -1.76728100 | 2.04439800  | 0.91155600  |
| H  | -5.06880900 | 2.80520300  | 0.63039800  |
| H  | -2.94418600 | 3.72095800  | 1.59778400  |
| H  | -0.83391200 | 2.43088600  | 1.30596700  |
| N  | -1.69780600 | 0.87777200  | 0.28141200  |
| Si | -1.02671100 | -1.72265200 | -1.01325800 |
| Si | -0.29048100 | -1.71442900 | 1.78476600  |
| C  | -1.25676400 | -3.61641500 | -0.99744600 |
| H  | -1.71497400 | -4.00698100 | -0.08448600 |
| H  | -1.88923600 | -3.91357700 | -1.84496400 |
| H  | -0.29140700 | -4.11942100 | -1.13055900 |
| C  | -0.30368700 | -1.36332600 | -2.74865400 |
| H  | -0.93125700 | -1.82242100 | -3.52518700 |
| H  | -0.24147400 | -0.28865600 | -2.94678600 |
| H  | 0.70764100  | -1.77601300 | -2.83794700 |
| C  | 0.73216400  | -3.31325300 | 1.93787200  |
| H  | 1.79909500  | -3.12217000 | 1.78254300  |
| H  | 0.61087800  | -3.71405300 | 2.95368600  |
| H  | 0.42502700  | -4.09627800 | 1.23729100  |
| C  | 0.36735800  | -0.55973200 | 3.16851700  |
| H  | -0.18115600 | 0.38790500  | 3.21656000  |
| H  | 0.25004000  | -1.06215100 | 4.13993400  |
| H  | 1.42822700  | -0.32875100 | 3.02726200  |
| C  | -2.07639900 | -2.13216900 | 2.32924200  |
| H  | -2.04596000 | -2.58449400 | 3.33004800  |
| H  | -2.69010300 | -1.22640400 | 2.39579100  |
| H  | -2.59570100 | -2.83275100 | 1.66736300  |
| Ni | 0.04716000  | -0.14218100 | 0.15910200  |
| C  | 1.43512900  | 1.14647800  | -0.11868800 |
| C  | 1.90803000  | -0.05684400 | -0.12788300 |



|   |            |             |             |
|---|------------|-------------|-------------|
| C | 3.11227700 | -0.84890600 | -0.32707300 |
| C | 3.05509800 | -2.22241500 | -0.62245400 |
| C | 5.54280300 | -0.97414300 | -0.45962400 |
| H | 4.44052400 | 0.82563900  | -0.03094300 |
| C | 4.21967200 | -2.95868000 | -0.83616700 |
| H | 2.08474400 | -2.70380000 | -0.68331300 |
| C | 5.46842900 | -2.33912000 | -0.75320600 |
| H | 6.51059400 | -0.48307300 | -0.39540600 |
| H | 4.15202500 | -4.01885200 | -1.06679000 |
| H | 6.37641600 | -2.91358100 | -0.91633600 |
| C | 1.64457200 | 2.57667200  | -0.20332100 |
| C | 2.59737600 | 3.22038900  | 0.61514600  |
| C | 0.88574600 | 3.37013000  | -1.08822700 |
| C | 2.78662500 | 4.59938400  | 0.54163400  |
| H | 3.17975100 | 2.62606900  | 1.31385200  |
| C | 1.09077600 | 4.74611900  | -1.16914200 |
| H | 0.14369500 | 2.88765400  | -1.71822500 |
| C | 2.03861700 | 5.36940600  | -0.35303300 |
| H | 3.52531000 | 5.07406800  | 1.18279800  |
| H | 0.50436400 | 5.33570200  | -1.86957700 |
| H | 2.19190400 | 6.44353800  | -0.41240100 |

**TS2a**

|    |             |             |             |
|----|-------------|-------------|-------------|
| C  | -3.27686600 | -1.83420100 | -0.10841700 |
| C  | -2.12211400 | -1.07120400 | -0.18486100 |
| C  | -2.24854900 | 0.32994600  | 0.03379900  |
| C  | -3.52065900 | 0.92336000  | 0.31590700  |
| C  | -4.66670600 | 0.08826900  | 0.37476400  |
| C  | -4.54526500 | -1.26649200 | 0.16608300  |
| H  | -3.21832400 | -2.90955700 | -0.26348400 |
| C  | -3.58373400 | 2.32104500  | 0.53393100  |
| H  | -5.63304700 | 0.53783000  | 0.58982900  |
| H  | -5.42306300 | -1.90590100 | 0.21376800  |
| C  | -2.43097900 | 3.06751000  | 0.46630600  |
| C  | -1.21288100 | 2.42011700  | 0.17487100  |
| H  | -4.54278900 | 2.78546400  | 0.75133600  |
| H  | -2.43518500 | 4.14071700  | 0.62673900  |
| H  | -0.29136200 | 2.98454100  | 0.10356900  |
| N  | -1.10376900 | 1.10967100  | -0.03214200 |
| Si | -0.34483100 | -1.70833600 | -0.56113400 |
| Si | 2.36863900  | -0.28100000 | 1.16272000  |
| C  | -0.17860300 | -3.34106900 | 0.43123000  |
| H  | -0.08891200 | -3.17946500 | 1.51145900  |
| H  | -1.05188000 | -3.98648700 | 0.26424800  |
| H  | 0.70200100  | -3.90764900 | 0.10489500  |
| C  | -0.37557600 | -2.26725300 | -2.39752200 |
| H  | -1.12893900 | -3.04670600 | -2.57685900 |
| H  | -0.59432200 | -1.42646700 | -3.06645500 |
| H  | 0.60060700  | -2.67460400 | -2.69119000 |
| C  | 3.16303800  | -2.00386700 | 1.15067500  |
| H  | 2.43818800  | -2.79846700 | 0.95886100  |
| H  | 3.96495200  | -2.09065700 | 0.41093500  |
| H  | 3.60811000  | -2.18639900 | 2.13826600  |
| C  | 3.71243900  | 0.93234900  | 1.77168400  |
| H  | 3.30435700  | 1.94815600  | 1.84138700  |
| H  | 4.04953100  | 0.63929700  | 2.77553600  |
| H  | 4.59387300  | 0.97305800  | 1.12285800  |
| C  | 1.09322900  | -0.19676100 | 2.59051500  |
| H  | 1.63344600  | -0.35450500 | 3.53592000  |
| H  | 0.61045200  | 0.78479800  | 2.64547100  |
| H  | 0.31035700  | -0.95464200 | 2.50719600  |
| Ni | 0.67400500  | 0.34099900  | -0.39094300 |
| C  | 1.87668100  | 1.65114600  | -1.05366700 |

|   |            |             |             |
|---|------------|-------------|-------------|
| C | 4.38040000 | -0.23639200 | -0.25037300 |
| C | 2.51141300 | 0.49857000  | -0.89788600 |
| C | 2.18016400 | 2.94183800  | -1.73214800 |
| H | 1.30289200 | 3.35908100  | -2.24140500 |
| H | 2.49748900 | 3.68784300  | -0.98853800 |
| H | 2.99699600 | 2.85630800  | -2.46558000 |
| C | 3.68301500 | -0.15589400 | -1.58821400 |
| H | 3.45353700 | -1.18948500 | -1.86948700 |
| H | 3.92483900 | 0.39986200  | -2.50336100 |
| H | 4.58884800 | -0.17539100 | -0.96900600 |

**TS2b**

|    |             |             |             |
|----|-------------|-------------|-------------|
| C  | -3.64950500 | 1.02355200  | -0.49284200 |
| C  | -2.32968600 | 0.70176300  | -0.21417500 |
| C  | -2.04236100 | -0.67112300 | 0.06291000  |
| C  | -3.08207200 | -1.65868400 | 0.06951900  |
| C  | -4.41139800 | -1.25937900 | -0.22472500 |
| C  | -4.68726300 | 0.05924000  | -0.50433300 |
| H  | -3.91002300 | 2.05750800  | -0.71063600 |
| C  | -2.73978900 | -2.99919900 | 0.37453000  |
| H  | -5.19881300 | -2.00923000 | -0.22256600 |
| H  | -5.70506800 | 0.36671900  | -0.73078900 |
| C  | -1.43301300 | -3.32299200 | 0.65794500  |
| C  | -0.46166200 | -2.30097500 | 0.62029700  |
| H  | -3.51918400 | -3.75777300 | 0.98406900  |
| H  | -1.13544900 | -4.33789000 | 0.30109300  |
| H  | 0.58089800  | -2.52214900 | 0.83168700  |
| N  | -0.73844300 | -1.03771200 | 0.33247600  |
| Si | -0.87204300 | 1.96885700  | -0.16097500 |
| Si | 2.48821600  | -0.39706300 | -1.25693500 |
| C  | -1.00078400 | 2.97608700  | -1.78778800 |
| H  | -0.88512700 | 2.33973600  | -2.67276600 |
| H  | -1.96396500 | 3.49827600  | -1.87423600 |
| H  | -0.21165500 | 3.73807500  | -1.82459200 |
| C  | -1.32583200 | 3.21055800  | 1.22652100  |
| H  | -2.28718500 | 3.70812700  | 1.03860700  |
| H  | -1.38798900 | 2.71491900  | 2.20226100  |
| H  | -0.55916800 | 3.99254400  | 1.30211500  |
| C  | 3.89796600  | 0.82663000  | -1.61871000 |
| H  | 3.49675100  | 1.84174600  | -1.72091500 |
| H  | 4.66526600  | 0.85319900  | -0.83849700 |
| H  | 4.38956100  | 0.56643800  | -2.56598800 |
| C  | 3.14463000  | -2.18794800 | -1.28772500 |
| H  | 2.35246800  | -2.90605900 | -1.04128600 |
| H  | 3.48022400  | -2.41854200 | -2.30793900 |
| H  | 3.98608100  | -2.37306000 | -0.61532500 |
| C  | 1.32725000  | -0.32598000 | -2.78555700 |
| H  | 1.88822800  | -0.65455600 | -3.67435700 |
| H  | 0.45905600  | -0.98487600 | -2.67419300 |
| H  | 0.95901100  | 0.68773600  | -2.96913900 |
| Ni | 0.79574400  | 0.40008700  | 0.26430900  |
| C  | 1.66381600  | 0.56349100  | 1.97007700  |
| C  | 2.52731600  | -0.10504800 | 1.26834500  |
| C  | 1.45569200  | 1.07369700  | 3.35051400  |
| H  | 1.25257500  | 2.15116100  | 3.34257700  |
| H  | 0.58297300  | 0.59470400  | 3.81237700  |
| H  | 2.32525300  | 0.89428200  | 4.00195900  |
| C  | 3.82898500  | -0.78492300 | 1.59269800  |
| H  | 4.16174900  | -0.46990900 | 2.59073300  |
| H  | 3.71961200  | -1.87565100 | 1.60740900  |
| H  | 4.63204600  | -0.55165500 | 0.88609200  |

C 3.81695300 2.09247100 -0.19467300

**TS2c**

C 2.72686800 1.23677900 -0.22282200  
C 2.99298600 -0.15945000 -0.30173700  
C 4.33492800 -0.65487500 -0.36375600  
C 5.40825500 0.27332000 -0.33610000  
C 5.15213400 1.62264100 -0.25087400  
H 3.65233000 3.16597400 -0.12922100  
C 4.53873100 -2.05374900 -0.44200500  
H 6.42772300 -0.10203500 -0.38015600  
H 5.97477400 2.33276800 -0.22689200  
C 3.45085600 -2.89455800 -0.45777100  
C 2.15642600 -2.33942900 -0.39524900  
H 5.55254200 -2.44451300 -0.48882300  
H 3.56249600 -3.97227100 -0.51749100  
H 1.28168300 -2.97733000 -0.40912700  
N 1.91562600 -1.03243800 -0.31627300  
Si 0.86895700 1.73509200 -0.18642800  
Si -1.29557900 -0.28148800 1.82601900  
C 0.75373500 3.16877000 1.08037400  
H 0.91082200 2.83949900 2.11377300  
H 1.50331400 3.94130900 0.86054600  
H -0.22794200 3.65591100 1.03293700  
C 0.54687800 2.56781000 -1.88694400  
H 1.21141500 3.42725100 -2.05087800  
H 0.70134700 1.86089000 -2.71077200  
H -0.48649600 2.93044300 -1.95817300  
C -2.18226400 1.30825100 2.34619000  
H -1.62886500 2.21252500 2.08283900  
H -3.18191800 1.37852600 1.90802600  
H -2.29669000 1.29018800 3.43875100  
C -2.35810900 -1.72632300 2.47125400  
H -1.89647800 -2.69156400 2.22981800  
H -2.44247100 -1.66091700 3.56466600  
H -3.37137800 -1.72250500 2.05671300  
C 0.31492100 -0.45750100 2.85004700  
H 0.02624800 -0.52508200 3.90968700  
H 0.86543300 -1.36963000 2.59807500  
H 0.98986500 0.39334100 2.72845900  
Ni 0.04966900 -0.41324300 -0.16820800  
C -1.16360500 -1.75729700 -0.73223700  
C -1.83810000 -0.70404600 -0.27523000  
C -1.50583300 -2.96799900 -1.52841100  
H -0.69519100 -3.26362400 -2.20540000  
H -1.68337000 -3.81940200 -0.85433200  
H -2.42319000 -2.83292000 -2.12097900  
C -3.16545300 -0.13214300 -0.58352300  
C -4.30330700 -0.95949900 -0.62662600  
C -3.32191400 1.23165500 -0.88633100  
C -5.55228100 -0.44045400 -0.96988900  
H -4.20295900 -2.01313000 -0.38202300  
C -4.56991300 1.74841600 -1.23030100  
H -2.44915400 1.87711900 -0.85981100  
C -5.69143300 0.91533500 -1.27283000  
H -6.41842800 -1.09694200 -0.99707800  
H -4.66739100 2.80475000 -1.46806400  
H -6.66421700 1.32003800 -1.53896000

C 2.94298800 -0.24364900 -0.54393400  
C 2.28836700 -1.29463700 0.15894100  
C 3.00787000 -2.44992700 0.60280900  
C 4.39562700 -2.54080200 0.31962200  
C 5.02856700 -1.52827000 -0.36437900  
H 4.83637900 0.39702300 -1.31416800  
C 2.30656700 -3.45237100 1.31593100  
H 4.94337200 -3.41800300 0.65522700  
H 6.09176700 -1.59793100 -0.57958700  
C 0.96189200 -3.29467200 1.55662900  
C 0.31126000 -2.13961100 1.07617600  
H 2.84046600 -4.33390500 1.66318900  
H 0.38707200 -4.03840300 2.09873500  
H -0.75258500 -2.00354000 1.23001700  
N 0.93056300 -1.16996300 0.40704900  
Si 1.83950700 1.25121000 -1.04670200  
Si -0.67277500 2.29987400 1.18151100  
C 2.89653100 2.80144600 -0.65712900  
H 3.00385900 2.98419200 0.41813200  
H 3.90632400 2.69611700 -1.07706100  
H 2.45673300 3.70005600 -1.10652800  
C 1.72553100 1.20524800 -2.96133100  
H 2.71670800 1.26166700 -3.43187500  
H 1.23859400 0.28695500 -3.31014100  
H 1.13312100 2.05177200 -3.33168600  
C -0.30633000 4.07911700 0.63481700  
H -1.05209100 4.46790600 -0.06562900  
H -0.32832500 4.72224400 1.52519000  
H 0.67831200 4.18323300 0.17328600  
C -2.28213000 2.37346300 2.20953000  
H -2.55377400 1.37452600 2.57133100  
H -2.13119000 3.01767800 3.08679800  
H -3.13810400 2.76864700 1.65127900  
C 0.61659500 1.78277800 2.50057900  
H 0.50778700 2.45693700 3.36307100  
H 0.44724000 0.76056500 2.85538300  
H 1.64462100 1.84906800 2.13570600  
Ni -0.09938600 0.41444600 -0.15255900  
C -1.96146400 0.02738200 -0.28985000  
C -1.74320500 1.32111800 -0.49364500  
C -2.43156500 2.37779300 -1.32174700  
H -3.16794300 1.90008300 -1.97946500  
H -2.96558100 3.11633300 -0.71035700  
H -1.71524500 2.92467800 -1.94465900  
C -3.06334300 -0.90283000 -0.42831500  
C -2.84203800 -2.21736200 -0.89225900  
C -4.38310200 -0.53513600 -0.08386200  
C -3.89699100 -3.11672000 -1.02780400  
H -1.83091100 -2.51135700 -1.16085100  
C -5.43180500 -1.44487700 -0.19703400  
H -4.56993500 0.46949400 0.28485300  
C -5.19525200 -2.73743800 -0.67430500  
H -3.70676800 -4.11932600 -1.40266500  
H -6.43907200 -1.14357500 0.07980300  
H -6.01583100 -3.44372500 -0.76824900

**TS2d**

C 4.30036700 -0.38826500 -0.78512200

**TS2e**

C -4.50101800 -1.42121000 -0.86082400

|    |             |             |             |
|----|-------------|-------------|-------------|
| C  | -3.24251500 | -0.90977400 | -0.58494400 |
| C  | -4.34163900 | 1.25608600  | -0.05278200 |
| C  | -5.60109800 | 0.67483800  | -0.35341100 |
| C  | -5.67793000 | -0.64071100 | -0.74962600 |
| H  | -4.59994400 | -2.45824700 | -1.17495800 |
| C  | -4.20242500 | 2.60083400  | 0.36821600  |
| H  | -6.49596700 | 1.28546800  | -0.26160300 |
| H  | -6.64317200 | -1.08565900 | -0.97735500 |
| C  | -2.94989300 | 3.09540700  | 0.64551900  |
| C  | -1.83166000 | 2.24841100  | 0.50202600  |
| H  | -5.08769900 | 3.22506900  | 0.46519300  |
| H  | -2.79823400 | 4.12018300  | 0.96836200  |
| H  | -0.83382400 | 2.62108400  | 0.69881300  |
| N  | -1.91469400 | 0.97697000  | 0.11714600  |
| Si | -1.56791600 | -1.84728500 | -0.70298800 |
| Si | 0.83247500  | -1.19616700 | 1.92208300  |
| C  | -1.91750800 | -3.59178800 | 0.00849900  |
| H  | -2.10276300 | -3.57732100 | 1.08873700  |
| H  | -2.79773400 | -4.03928800 | -0.47319000 |
| H  | -1.07525100 | -4.27012900 | -0.17491900 |
| C  | -1.27156800 | -2.12716100 | -2.57848900 |
| H  | -2.09087000 | -2.69594000 | -3.03917900 |
| H  | -1.18247000 | -1.17314500 | -3.11159900 |
| H  | -0.34185600 | -2.68355600 | -2.75119600 |
| C  | 1.18525100  | -3.05574600 | 1.92897100  |
| H  | 0.42665900  | -3.63781800 | 1.40125700  |
| H  | 2.16206500  | -3.28994700 | 1.49623300  |
| H  | 1.19597000  | -3.38803300 | 2.97629800  |
| C  | 2.19318600  | -0.39796000 | 2.99235700  |
| H  | 2.03540700  | 0.68300000  | 3.08823600  |
| H  | 2.16710900  | -0.83072900 | 4.00178600  |
| H  | 3.19626500  | -0.56070800 | 2.58383600  |
| C  | -0.75677600 | -0.86237000 | 2.93748300  |
| H  | -0.56633900 | -1.20762600 | 3.96473400  |
| H  | -0.99881900 | 0.20413600  | 2.98677500  |
| H  | -1.63036200 | -1.39323500 | 2.55053600  |
| Ni | -0.26889900 | -0.11277400 | 0.05739800  |
| C  | 1.27943400  | 0.99608100  | 0.00429800  |
| C  | 1.63674500  | -0.28648700 | 0.08997900  |
| C  | 1.84251500  | 2.30182800  | -0.25636700 |
| C  | 1.28022700  | 3.13258000  | -1.25132400 |
| C  | 2.92040700  | 2.81353800  | 0.50105900  |
| C  | 1.80209000  | 4.39858300  | -1.50520400 |
| H  | 0.44354200  | 2.75617800  | -1.83360500 |
| C  | 3.41562600  | 4.09418400  | 0.26522100  |
| H  | 3.34966400  | 2.20232400  | 1.28975800  |
| C  | 2.86752200  | 4.88957100  | -0.74478300 |
| H  | 1.36887600  | 5.01010800  | -2.29273600 |
| H  | 4.24088500  | 4.46924500  | 0.86533300  |
| H  | 3.26392400  | 5.88323400  | -0.93484500 |
| C  | 2.78400000  | -1.07162800 | -0.41706800 |
| C  | 2.58542800  | -2.31502600 | -1.04252300 |
| C  | 4.09749000  | -0.57450000 | -0.32660300 |
| C  | 3.65938300  | -3.03343700 | -1.56557900 |
| H  | 1.57567700  | -2.70504200 | -1.12432700 |
| C  | 5.17108300  | -1.29501900 | -0.84958300 |
| H  | 4.27177700  | 0.38675500  | 0.14513100  |
| C  | 4.95832300  | -2.52815600 | -1.46948100 |
| H  | 3.48088200  | -3.98904000 | -2.05212400 |
| H  | 6.17716000  | -0.89073600 | -0.77109600 |
| H  | 5.79590500  | -3.08928500 | -1.87509100 |

## R2a

|   |             |             |             |
|---|-------------|-------------|-------------|
| C | -3.16439100 | 0.45002100  | -0.17132500 |
| C | 0.00000000  | 0.00000000  | 0.60459600  |
| C | 0.00000000  | 0.00000000  | -0.60459600 |
| C | 0.00000000  | 0.00000000  | 2.06619900  |
| H | -0.51068600 | 0.88473000  | 2.46621200  |
| H | -0.51085600 | -0.88463200 | 2.46621200  |
| H | 1.02154200  | -0.00009800 | 2.46621200  |
| C | 0.00000000  | 0.00000000  | -2.06619900 |
| H | 0.51068600  | 0.88473000  | -2.46621200 |
| H | 0.51085600  | -0.88463200 | -2.46621200 |
| H | -1.02154200 | -0.00009800 | -2.46621200 |

## R2b

|   |             |             |             |
|---|-------------|-------------|-------------|
| C | -0.60788900 | -0.00002300 | 0.00000100  |
| C | 0.60788900  | 0.00002500  | 0.00000600  |
| C | 2.03706000  | 0.00001100  | 0.00000500  |
| C | 2.75339000  | 0.85785000  | 0.85715600  |
| C | 2.75337500  | -0.85783900 | -0.85714400 |
| C | 4.14604200  | 0.85468300  | 0.85400100  |
| H | 2.20554300  | 1.52090900  | 1.51966700  |
| C | 4.14602800  | -0.85469200 | -0.85399300 |
| H | 2.20551900  | -1.52088900 | -1.51965600 |
| C | 4.84706600  | -0.00001100 | 0.00000300  |
| H | 4.68605400  | 1.52180500  | 1.52058100  |
| H | 4.68602700  | -1.52182300 | -1.52057600 |
| H | 5.93366000  | -0.00001800 | 0.00000300  |
| C | -2.03706000 | -0.00000900 | -0.00000200 |
| C | -2.75339100 | -0.85779700 | 0.85719900  |
| C | -2.75337400 | 0.85778700  | -0.85720500 |
| C | -4.14604200 | -0.85463200 | 0.85404200  |
| H | -2.20554500 | -1.52080800 | 1.51975900  |
| C | -4.14602700 | 0.85463900  | -0.85405700 |
| H | -2.20551700 | 1.52079000  | -1.51976400 |
| C | -4.84706600 | 0.00000900  | -0.00001000 |
| H | -4.68605500 | -1.52170700 | 1.52066900  |
| H | -4.68602500 | 1.52172100  | -1.52068800 |
| H | -5.93366000 | 0.00001500  | -0.00001300 |

## R2c

|   |             |             |             |
|---|-------------|-------------|-------------|
| C | -1.39433800 | 0.00070300  | -0.00034700 |
| C | -2.60675700 | 0.00055200  | -0.00049700 |
| C | -4.06625200 | -0.00033900 | 0.00029500  |
| H | -4.46497000 | 0.95732700  | -0.35586500 |
| H | -4.46450900 | -0.78877700 | -0.65018200 |
| H | -4.46494200 | -0.17073800 | 1.00837100  |
| C | 0.03548500  | 0.00036300  | -0.00018600 |
| C | 0.75269700  | -1.21177200 | -0.00006600 |
| C | 0.75342300  | 1.21206200  | -0.00006300 |
| C | 2.14534900  | -1.20815100 | 0.00009800  |
| H | 0.20472300  | -2.14914800 | -0.00003300 |
| C | 2.14607700  | 1.20760200  | 0.00009600  |
| H | 0.20606000  | 2.14979600  | -0.00003000 |
| C | 2.84738200  | -0.00048300 | 0.00017000  |
| H | 2.68496100  | -2.15156600 | 0.00020700  |
| H | 2.68624500  | 2.15069800  | 0.00020400  |
| H | 3.93403100  | -0.00081400 | 0.00033200  |

## INT4a

|   |             |             |            |
|---|-------------|-------------|------------|
| C | -3.62362800 | -1.17834700 | 1.06866000 |
| C | -2.33279300 | -0.76243500 | 0.76250700 |

|    |             |             |             |
|----|-------------|-------------|-------------|
| C  | -1.57569800 | -1.58795100 | -0.12919600 |
| C  | -2.17141000 | -2.76516800 | -0.69903800 |
| C  | -3.49180700 | -3.13326300 | -0.33493200 |
| C  | -4.20512100 | -2.35452800 | 0.54221500  |
| H  | -4.23229600 | -0.57855400 | 1.74013400  |
| C  | -1.42739100 | -3.52640600 | -1.63401400 |
| H  | -3.92281200 | -4.03291000 | -0.76750500 |
| H  | -5.21797900 | -2.62762300 | 0.82541300  |
| C  | -0.15977000 | -3.12230600 | -1.97467700 |
| C  | 0.37149200  | -1.97441600 | -1.35332500 |
| H  | -1.87532300 | -4.41527600 | -2.07165000 |
| H  | 0.44348200  | -3.66844200 | -2.69286200 |
| H  | 1.38682600  | -1.65885100 | -1.57489500 |
| N  | -0.28473400 | -1.23487600 | -0.46342700 |
| Si | -1.76408900 | 0.84299200  | 1.64082400  |
| Si | -0.88110000 | 1.90865600  | -1.99989100 |
| C  | -3.26133300 | 2.02553300  | 1.70131000  |
| H  | -3.62671800 | 2.29338000  | 0.70410500  |
| H  | -4.10470300 | 1.61828200  | 2.27170300  |
| H  | -2.95855300 | 2.95554700  | 2.19870300  |
| C  | -1.45226400 | 0.32276400  | 3.44447800  |
| H  | -2.27037300 | -0.32568900 | 3.78093600  |
| H  | -0.51880300 | -0.23835600 | 3.56071200  |
| H  | -1.41681100 | 1.18467300  | 4.12058700  |
| C  | -1.29393500 | 3.70105000  | -2.51283800 |
| H  | -0.40190600 | 4.32430100  | -2.63656600 |
| H  | -1.83446600 | 3.70409700  | -3.46822300 |
| H  | -1.93738600 | 4.18899200  | -1.76971300 |
| C  | 0.20475500  | 1.16795700  | -3.37489900 |
| H  | 0.38068800  | 0.09881100  | -3.21424200 |
| H  | -0.29189900 | 1.27993800  | -4.34740700 |
| H  | 1.18235100  | 1.65808300  | -3.44888500 |
| C  | -2.54839200 | 1.00276500  | -2.07084200 |
| H  | -3.02800500 | 1.30442000  | -3.01184600 |
| H  | -2.45575800 | -0.08540500 | -2.08599400 |
| H  | -3.23311100 | 1.26952500  | -1.26066000 |
| Ni | 0.85733000  | 0.17969300  | 0.47900900  |
| C  | -0.26666800 | 1.80383300  | 0.97211400  |
| C  | 0.10215600  | 2.04252800  | -0.37046800 |
| C  | 0.26036700  | 2.73555600  | 2.07223600  |
| H  | 0.29883400  | 2.25031000  | 3.05139400  |
| H  | 1.26019900  | 3.12213600  | 1.86694500  |
| H  | -0.40436800 | 3.60838100  | 2.17045700  |
| C  | 1.21001200  | 3.08440100  | -0.61895700 |
| H  | 2.06888600  | 2.94311300  | 0.04265600  |
| H  | 1.59189500  | 3.03924300  | -1.64483700 |
| H  | 0.84470100  | 4.11024300  | -0.46430200 |
| C  | 3.81549300  | 0.78207000  | 1.06092300  |
| C  | 4.04906000  | 0.73293800  | -0.46365900 |
| C  | 2.57795900  | -2.34358700 | 1.28119400  |
| C  | 4.02753800  | -0.57051700 | -1.21992600 |
| C  | 3.98120000  | -2.33445000 | 0.63892600  |
| C  | 4.01455400  | -1.83670200 | -0.78492000 |
| H  | 3.92391800  | 1.84034300  | 1.33528900  |
| H  | 5.02330200  | 1.21101900  | -0.66225900 |
| H  | 1.89743000  | -2.92138200 | 0.63709600  |
| H  | 4.35501200  | -3.36638500 | 0.64827800  |
| H  | 4.64758100  | 0.27813000  | 1.57252100  |
| H  | 3.31448700  | 1.39117800  | -0.94397100 |
| H  | 2.65873900  | -2.93239400 | 2.20817400  |
| H  | 4.04626600  | -0.42859200 | -2.30285600 |
| H  | 4.66421700  | -1.76336100 | 1.27414000  |
| H  | 4.00217100  | -2.61622900 | -1.54864700 |
| C  | 2.47598300  | 0.31367000  | 1.64145000  |
| C  | 1.94584400  | -1.00657600 | 1.65780900  |

|   |            |             |            |
|---|------------|-------------|------------|
| H | 2.18675300 | 0.92982500  | 2.49407800 |
| H | 1.21685600 | -1.16532700 | 2.45988300 |

#### INT4b

|    |             |             |             |
|----|-------------|-------------|-------------|
| C  | -4.80893800 | 0.79721500  | -0.13472500 |
| C  | -3.46451400 | 0.46008100  | -0.18857700 |
| C  | -2.54363400 | 1.36737100  | 0.42186100  |
| C  | -3.00038500 | 2.57286200  | 1.04947500  |
| C  | -4.39054400 | 2.85545900  | 1.06875300  |
| C  | -5.27836000 | 1.97995300  | 0.48737800  |
| H  | -5.54228800 | 0.13310400  | -0.58800500 |
| C  | -2.04098800 | 3.43938700  | 1.62891100  |
| H  | -4.73500300 | 3.76925000  | 1.54678200  |
| H  | -6.34384500 | 2.19459600  | 0.50104800  |
| C  | -0.70529800 | 3.11593400  | 1.57602300  |
| C  | -0.32607900 | 1.91201400  | 0.94555700  |
| H  | -2.37624800 | 4.35591400  | 2.10928500  |
| H  | 0.05824800  | 3.75534900  | 2.00622900  |
| H  | 0.72450000  | 1.63990600  | 0.88403300  |
| N  | -1.19413900 | 1.07017100  | 0.39988100  |
| Si | -2.76336500 | -1.13122800 | -1.03033500 |
| Si | 1.25703200  | -3.24435900 | 1.38268300  |
| C  | -3.75314100 | -2.59838600 | -0.30174700 |
| H  | -3.59617700 | -2.69626100 | 0.77915200  |
| H  | -4.83354700 | -2.49784600 | -0.47503300 |
| H  | -3.43177200 | -3.53891400 | -0.76640400 |
| C  | -3.25999100 | -1.00661100 | -2.87558200 |
| H  | -4.34904800 | -0.94788400 | -3.00892000 |
| H  | -2.81716700 | -0.12404900 | -3.35271200 |
| H  | -2.90581100 | -1.88849000 | -3.42390300 |
| C  | 0.56845600  | -5.00611200 | 1.57630000  |
| H  | 1.23861100  | -5.75131600 | 1.13063700  |
| H  | 0.43673200  | -5.27114200 | 2.63318200  |
| H  | -0.40566300 | -5.10305900 | 1.08166300  |
| C  | 2.86107100  | -3.12984900 | 2.40187300  |
| H  | 3.28537600  | -2.11860700 | 2.36802100  |
| H  | 2.68062100  | -3.38036200 | 3.45509400  |
| H  | 3.62784400  | -3.81931400 | 2.02813900  |
| C  | 0.00120700  | -2.03819900 | 2.14841800  |
| H  | -0.27096500 | -2.36051500 | 3.16224800  |
| H  | 0.40016000  | -1.01972300 | 2.23209000  |
| H  | -0.94007200 | -2.00218000 | 1.57783600  |
| Ni | -0.48270200 | -0.73017800 | -0.43350200 |
| C  | 0.91502000  | -1.90198200 | -1.11628700 |
| C  | 1.58723400  | -2.86781100 | -0.42763200 |
| C  | 1.20892300  | -1.71346100 | -2.60276200 |
| H  | 0.60139700  | -0.92107000 | -3.05856400 |
| H  | 2.26488100  | -1.45595200 | -2.78095900 |
| H  | 1.01337200  | -2.63177200 | -3.17762700 |
| C  | 2.63082400  | -3.74893200 | -1.11769500 |
| H  | 3.43943000  | -3.15200100 | -1.56366500 |
| H  | 3.10280400  | -4.46552800 | -0.43494500 |
| H  | 2.18629700  | -4.33205100 | -1.93749900 |
| C  | 4.11802200  | 1.44657500  | -1.50884500 |
| C  | 4.02073200  | 0.71964400  | -0.15007200 |
| C  | 2.69421700  | 4.29162700  | -0.69482900 |
| C  | 3.64596300  | 1.53177300  | 1.06517100  |
| C  | 3.85996300  | 3.97690700  | 0.26765900  |
| C  | 3.57696500  | 2.85842000  | 1.24998900  |
| H  | 4.44137900  | 0.70514800  | -2.24969800 |
| H  | 4.98360700  | 0.22276500  | 0.05167400  |
| H  | 1.82272300  | 4.60228200  | -0.09839800 |

|   |            |             |             |
|---|------------|-------------|-------------|
| H | 4.06641800 | 4.89031000  | 0.83956000  |
| H | 4.91359500 | 2.19565200  | -1.47765400 |
| H | 3.29134500 | -0.09793100 | -0.24306900 |
| H | 2.96173300 | 5.18207200  | -1.28653400 |
| H | 3.40929900 | 0.91240000  | 1.93301000  |
| H | 4.76924500 | 3.78047600  | -0.30563600 |
| H | 3.27179000 | 3.19182500  | 2.24314500  |
| C | 2.81022800 | 2.04548300  | -1.98262400 |
| C | 2.23609500 | 3.20674800  | -1.63907400 |
| H | 2.25902800 | 1.42646200  | -2.69045300 |
| H | 1.28216400 | 3.43381000  | -2.11862900 |

#### INT4c

|    |             |             |             |
|----|-------------|-------------|-------------|
| C  | 3.96705900  | 1.64109900  | 0.88533300  |
| C  | 2.64970600  | 1.38814400  | 0.51398700  |
| C  | 1.63824600  | 1.62817100  | 1.50066000  |
| C  | 2.00366700  | 2.17226800  | 2.78118100  |
| C  | 3.36945500  | 2.38943600  | 3.09425400  |
| C  | 4.33978300  | 2.11771000  | 2.16171300  |
| H  | 4.76287200  | 1.47908600  | 0.16242000  |
| C  | 0.98089200  | 2.51452500  | 3.70040400  |
| H  | 3.62538800  | 2.78551300  | 4.07428200  |
| H  | 5.38907100  | 2.28514400  | 2.39011700  |
| C  | -0.33311900 | 2.33500600  | 3.33924200  |
| C  | -0.61419200 | 1.75479300  | 2.08766600  |
| H  | 1.25241800  | 2.93266000  | 4.66674000  |
| H  | -1.15144200 | 2.61193900  | 3.99687600  |
| H  | -1.64488500 | 1.57315100  | 1.79928000  |
| N  | 0.31003400  | 1.37444000  | 1.20840600  |
| Si | 2.46002800  | 0.81305500  | -1.31207300 |
| Si | -0.43793200 | 3.23447300  | -1.62577200 |
| C  | 3.32795400  | 2.11121000  | -2.41454200 |
| H  | 2.78962400  | 3.06105700  | -2.47891700 |
| H  | 4.34933100  | 2.32590300  | -2.07594200 |
| H  | 3.40108400  | 1.70758800  | -3.43296600 |
| C  | 3.56287300  | -0.72522800 | -1.45651000 |
| H  | 4.56143200  | -0.51884500 | -1.05266800 |
| H  | 3.15886200  | -1.58112600 | -0.91098100 |
| H  | 3.69138800  | -1.02119900 | -2.50437400 |
| C  | -0.34599000 | 4.10881500  | -3.32287500 |
| H  | -1.11244500 | 3.74919600  | -4.01874500 |
| H  | -0.48680300 | 5.19153800  | -3.20674500 |
| H  | 0.62994100  | 3.95233300  | -3.79945100 |
| C  | -2.12467600 | 3.68756300  | -0.86237500 |
| H  | -2.28758600 | 3.17220800  | 0.09073900  |
| H  | -2.15768500 | 4.76716800  | -0.66474300 |
| H  | -2.97272500 | 3.44942500  | -1.51343900 |
| C  | 0.83085000  | 4.13591500  | -0.52895300 |
| H  | 0.76017200  | 5.20288100  | -0.78132800 |
| H  | 0.59068900  | 4.03786500  | 0.53359900  |
| H  | 1.87266600  | 3.83962100  | -0.66325300 |
| Ni | -0.30018300 | 0.05219400  | -0.28958000 |
| C  | 0.72751700  | 0.44496200  | -1.98363900 |
| C  | -0.35859900 | 1.36019700  | -1.96993800 |
| C  | 0.78248300  | -0.67721300 | -3.02670400 |
| H  | 1.34521900  | -1.53842800 | -2.65949000 |
| H  | -0.20728200 | -1.03804700 | -3.31609900 |
| H  | 1.27928000  | -0.33455200 | -3.95092400 |
| C  | -1.55286500 | 1.04102500  | -2.88707700 |
| H  | -1.83832100 | -0.01157300 | -2.83239100 |
| H  | -2.44351700 | 1.61958200  | -2.62196900 |
| H  | -1.32710700 | 1.26245200  | -3.94183500 |
| C  | -0.99749700 | -1.65728200 | 0.10694800  |

|   |             |             |             |
|---|-------------|-------------|-------------|
| N | -0.44422600 | -2.92659300 | 0.09510600  |
| N | -2.34257000 | -1.88024600 | 0.36040000  |
| C | -1.38220500 | -3.99077000 | 0.50519600  |
| C | 0.94401600  | -3.27320600 | 0.09672900  |
| C | -2.73537900 | -3.29743900 | 0.37375400  |
| C | -3.33901000 | -0.87319000 | 0.54814400  |
| H | -1.17396300 | -4.30410500 | 1.53912000  |
| H | -1.29075500 | -4.87123700 | -0.13695600 |
| C | 1.74522800  | -3.00006200 | 1.22729800  |
| C | 1.45078800  | -4.02225400 | -0.98649100 |
| H | -3.40976000 | -3.51090600 | 1.20975600  |
| H | -3.25137700 | -3.57576800 | -0.55664800 |
| C | -3.50661200 | -0.32546700 | 1.83948400  |
| C | -4.20604100 | -0.52173800 | -0.50474200 |
| C | 3.06560600  | -3.46403500 | 1.23750700  |
| C | 1.20117100  | -2.25065000 | 2.41933300  |
| C | 2.77665200  | -4.47083500 | -0.93256200 |
| C | 0.59217200  | -4.36753200 | -2.18146200 |
| C | -4.49480900 | 0.64521800  | 2.03431000  |
| C | -2.67486700 | -0.81704600 | 3.00104700  |
| C | -5.18542200 | 0.45295500  | -0.26811100 |
| C | -4.14146900 | -1.20688600 | -1.84896300 |
| C | 3.58152400  | -4.19652700 | 0.16960800  |
| H | 3.68959600  | -3.25608800 | 2.10330000  |
| H | 0.98240200  | -1.20848700 | 2.16598800  |
| H | 0.26380900  | -2.69131200 | 2.77944800  |
| H | 1.92039100  | -2.26608300 | 3.24436900  |
| H | 3.17588000  | -5.04005200 | -1.76873700 |
| H | 0.01764100  | -5.28932400 | -2.01224000 |
| H | -0.12264900 | -3.57211700 | -2.40590500 |
| H | 1.21252600  | -4.53675700 | -3.06756600 |
| C | -5.32308000 | 1.04384500  | 0.98438400  |
| H | -4.62706400 | 1.07719100  | 3.02364600  |
| H | -2.90081400 | -1.86701400 | 3.22959200  |
| H | -1.60389100 | -0.76005200 | 2.78881800  |
| H | -2.88259000 | -0.23217400 | 3.90281800  |
| H | -5.84759200 | 0.74357000  | -1.08046700 |
| H | -3.14131300 | -1.59121100 | -2.05887800 |
| H | -4.84066600 | -2.05401000 | -1.88804600 |
| H | -4.42122100 | -0.52051100 | -2.65421200 |
| H | 4.60864800  | -4.55064800 | 0.19725700  |
| H | -6.08461800 | 1.80153800  | 1.14901000  |

#### TS3a

|    |             |             |             |
|----|-------------|-------------|-------------|
| C  | -3.92350600 | 0.76660700  | 1.13352100  |
| C  | -2.63181100 | 0.38501200  | 0.80410400  |
| C  | -2.47027600 | -0.54392900 | -0.25970400 |
| C  | -3.59498200 | -1.01913300 | -1.00335700 |
| C  | -4.89465300 | -0.60792700 | -0.60820400 |
| C  | -5.05513800 | 0.25986200  | 0.44853500  |
| H  | -4.08597400 | 1.48640000  | 1.93327200  |
| C  | -3.35862000 | -1.85800900 | -2.12182000 |
| H  | -5.75398900 | -0.97848700 | -1.16187600 |
| H  | -6.05117300 | 0.57740600  | 0.74617500  |
| C  | -2.06377700 | -2.17821400 | -2.45741600 |
| C  | -1.00714800 | -1.70842000 | -1.64788900 |
| H  | -4.19958900 | -2.22441100 | -2.70556200 |
| H  | -1.83593900 | -2.79882600 | -3.31839400 |
| H  | 0.01985900  | -1.97344000 | -1.87838500 |
| N  | -1.18255800 | -0.94210000 | -0.57466700 |
| Si | -1.03021700 | 1.06930500  | 1.63472100  |
| Si | 1.02701100  | 2.41806000  | -1.72855300 |

|    |             |             |             |
|----|-------------|-------------|-------------|
| C  | -1.25384900 | 2.96296000  | 1.62721200  |
| H  | -1.21801400 | 3.37998000  | 0.61599600  |
| H  | -2.22021700 | 3.23775200  | 2.07146100  |
| H  | -0.46621200 | 3.44979000  | 2.21319100  |
| C  | -1.16531700 | 0.57011400  | 3.47870600  |
| H  | -2.15407100 | 0.85665100  | 3.86194400  |
| H  | -1.05638200 | -0.51109200 | 3.62253500  |
| H  | -0.41821100 | 1.07227200  | 4.10304000  |
| C  | 1.08471700  | 4.31225200  | -1.95697200 |
| H  | 2.08490500  | 4.74067300  | -1.83232000 |
| H  | 0.73707600  | 4.57705500  | -2.96398200 |
| H  | 0.42104600  | 4.81364700  | -1.24093700 |
| C  | 2.13888500  | 1.63288500  | -3.06103900 |
| H  | 2.06410100  | 0.53878700  | -3.03130300 |
| H  | 1.84007500  | 1.96074500  | -4.06511000 |
| H  | 3.19513600  | 1.89607800  | -2.92860600 |
| C  | -0.75868400 | 1.94599500  | -2.15761700 |
| H  | -1.04318700 | 2.52773200  | -3.04491100 |
| H  | -0.86818400 | 0.88917000  | -2.40942100 |
| H  | -1.47973600 | 2.18199300  | -1.36973000 |
| Ni | 0.33063700  | -0.33548500 | 0.59115600  |
| C  | 1.31758900  | 1.27530800  | 1.03457400  |
| C  | 1.74934500  | 2.04999500  | -0.01305100 |
| C  | 2.04894800  | 1.44423800  | 2.36695100  |
| H  | 1.57828600  | 0.89432800  | 3.18407000  |
| H  | 3.08767300  | 1.09030400  | 2.30326700  |
| H  | 2.10259200  | 2.49916600  | 2.67204000  |
| C  | 3.05422400  | 2.84683400  | 0.16337400  |
| H  | 3.84413800  | 2.25222000  | 0.63957400  |
| H  | 3.46028600  | 3.20509500  | -0.78820700 |
| H  | 2.90305700  | 3.73517800  | 0.79501800  |
| C  | 3.14651100  | -1.76895600 | 1.44939500  |
| C  | 3.62232100  | -1.30596900 | 0.05685300  |
| C  | 0.63959900  | -3.68538000 | 0.45408900  |
| C  | 3.08091400  | -1.96854400 | -1.18411300 |
| C  | 1.94363900  | -4.07935400 | -0.27142100 |
| C  | 2.39567500  | -3.10949000 | -1.33792500 |
| H  | 3.68668100  | -1.15022200 | 2.17519600  |
| H  | 4.72128100  | -1.39153700 | 0.03193400  |
| H  | -0.17795400 | -3.63160600 | -0.27792800 |
| H  | 1.76758900  | -5.05377000 | -0.74426600 |
| H  | 3.49243900  | -2.79208600 | 1.63782000  |
| H  | 3.41155600  | -0.23379000 | -0.03402200 |
| H  | 0.36611500  | -4.52436700 | 1.11397200  |
| H  | 3.31387900  | -1.41520600 | -2.09531600 |
| H  | 2.73323600  | -4.24914100 | 0.46553200  |
| H  | 2.11858700  | -3.37999100 | -2.35809900 |
| C  | 1.66037500  | -1.65721500 | 1.78208800  |
| C  | 0.62580700  | -2.44399900 | 1.32204200  |
| H  | 1.46026600  | -1.12211100 | 2.70585900  |
| H  | -0.30081200 | -2.37229700 | 1.89493300  |

### Pro

|    |             |             |             |
|----|-------------|-------------|-------------|
| C  | 1.99585300  | 2.08360100  | -0.49683200 |
| C  | 1.68017200  | 0.83549900  | 0.02259200  |
| C  | 2.75237500  | -0.11368200 | 0.13051900  |
| C  | 4.08377800  | 0.24199500  | -0.26834400 |
| C  | 4.33505000  | 1.53726000  | -0.78899200 |
| C  | 3.30510500  | 2.43857200  | -0.90597500 |
| H  | 1.21943200  | 2.83625900  | -0.59689600 |
| C  | 5.10432800  | -0.73265000 | -0.12959600 |
| H  | 5.34667100  | 1.79854300  | -1.09162400 |
| H  | 3.48891600  | 3.43188700  | -1.30707900 |
| C  | 4.79470400  | -1.97561800 | 0.36769600  |
| C  | 3.44943000  | -2.23912600 | 0.72007500  |
| H  | 6.12130700  | -0.48175900 | -0.42357100 |
| H  | 5.55001600  | -2.74649800 | 0.48704400  |
| H  | 3.17574500  | -3.22090200 | 1.10609300  |
| Si | -0.10846200 | 0.47335600  | 0.62518900  |
| C  | -0.02069800 | -0.35952300 | 2.32348600  |
| H  | -0.99827400 | -0.41209900 | 2.81048300  |
| H  | 0.38529300  | -1.36875800 | 2.22988400  |
| H  | 0.65174800  | 0.20851000  | 2.97882400  |
| C  | -0.89158100 | 2.19705500  | 0.81970600  |
| H  | -1.00657800 | 2.70692600  | -0.14365600 |
| H  | -1.88313400 | 2.14875300  | 1.27618900  |
| H  | -0.26812300 | 2.82986300  | 1.46320400  |
| C  | -1.01461000 | -0.53295100 | -0.73157500 |
| C  | -2.35629900 | -0.59830900 | -0.95609300 |
| C  | -0.04628400 | -1.22251500 | -1.69301100 |
| H  | 0.37800500  | -0.51576300 | -2.42094200 |
| H  | 0.79773600  | -1.64963700 | -1.14439800 |
| H  | -0.51376200 | -2.03600700 | -2.25391700 |
| C  | -2.87194900 | -1.24261700 | -2.25074400 |
| H  | -3.01379200 | -2.32769700 | -2.14513800 |
| H  | -3.84431800 | -0.83251500 | -2.54444700 |
| H  | -2.19469100 | -1.07879700 | -3.09382900 |
| Si | -3.84046700 | -0.05483400 | 0.11739200  |
| C  | -4.49079200 | 1.62905700  | -0.47389500 |
| H  | -3.76809400 | 2.43298700  | -0.29832600 |
| H  | -4.70814700 | 1.61074900  | -1.54879100 |
| H  | -5.42062700 | 1.89391600  | 0.04525900  |
| C  | -3.60970900 | -0.04024800 | 2.00188000  |
| H  | -3.24496100 | -1.01065100 | 2.35771300  |
| H  | -2.94184500 | 0.73176500  | 2.38945700  |
| H  | -4.59479400 | 0.12281400  | 2.45849800  |
| C  | -5.22522900 | -1.33620000 | -0.14478800 |
| H  | -6.06774700 | -1.09865700 | 0.51692700  |
| H  | -5.61227000 | -1.36158900 | -1.16856200 |
| H  | -4.88908900 | -2.34930400 | 0.10793300  |
| N  | 2.47121700  | -1.36274900 | 0.61155400  |
